1  
2  
3  
4  
5  
6  
7  
8  
9  
10  
11  
12  
13  
14  
15  
16  
17  
18  
19  
20  
21  
22  
23

Aquaporin expression in the Japanese medaka (*Oryzias latipes*, Temminck & Schlegel) in FW and SW: challenging the paradigm of intestinal water transport?

Steffen S. Madsen<sup>1,2,\*</sup>, Joanna Bujak<sup>2</sup> and Christian K. Tipsmark<sup>2</sup>

<sup>1</sup>Department of Biology, University of Southern Denmark, DK-5230 Odense M, Denmark.

<sup>2</sup>Department of Biological Sciences, University of Arkansas, SCEN601, Fayetteville, AR72701, USA.

\*) author for correspondence (steffen@biology.sdu.dk)

The Journal of Experimental Biology – ACCEPTED AUTHOR MANUSCRIPT

## 24 Abstract

25 We investigated the salinity dependent expression dynamics of 7 aquaporin paralogs (*aqp1a*, *-3a*, *-*  
26 *7*, *-8ab*, *-10a*, *-10b* and *-11a*) in several tissues of euryhaline Japanese medaka (*Oryzias latipes*). All  
27 paralogs except *aqp7* and *-10a* had a broad tissue distribution and several were affected by salinity  
28 in both osmoregulatory and non-osmoregulatory tissues. In the intestine, *aqp1a*, *-7*, *-8ab* and *-10a*  
29 decreased upon seawater (SW)-acclimation in both long-term acclimated fish and during 1-3 days  
30 of the transition period. In the gill, *aqp3a* was lower and *aqp10a* higher in SW than in freshwater  
31 (FW). In the kidney no *aqps* were affected by salinity. In the skin, *aqp1a* and *-3a* were lower in SW  
32 than in FW. In the liver *aqp8ab* and *-10a* were lower in SW than in FW. Further, 6 Na<sup>+</sup>,K<sup>+</sup>-ATPase  
33  $\alpha$ -subunit isoform transcripts were analyzed in the intestine but none showed a consistent response  
34 to salinity, suggesting that water transport is not regulated at this level. In contrast, mRNA of the  
35 Na<sup>+</sup>,K<sup>+</sup>,2Cl<sup>-</sup>-cotransporter type-2 strongly increased in the intestine in SW compared to FW fish.  
36 Using custom made antibodies, Aqp1a, *-8ab* and *-10a* were localized in the apical region of  
37 enterocytes of FW fish. Apical staining intensity strongly decreased, vanished or moved to sub  
38 apical regions, when fish were acclimated to SW, supporting the lower mRNA expression in SW.  
39 Western blots confirmed the decrease in Aqp1a and *-10a* in SW. The strong decrease in aquaporin  
40 expression in the intestine of SW fish is surprising and challenges the paradigm for transepithelial  
41 intestinal water absorption in SW fishes.

42  
43  
44  
45  
46  
47 Key words: Aquaporin, intestine, salinity, water transport

48

## 49 Introduction

50 Teleost osmoregulation has been the focus of hundreds of papers since the pioneering studies of  
51 Homer W. Smith, August Krogh and colleagues in the 1930s (Smith, 1929; Krogh, 1937). This has  
52 led to several models describing the overall mechanisms as well as molecular details of the major  
53 osmoregulatory organs, such as gill, kidney and intestine. Based on relatively few euryhaline  
54 "model" species (rainbow trout, eel, killifish, tilapia) consensus models have been established on  
55 many of the detailed osmoregulatory mechanisms used by euryhaline teleosts when living in  
56 freshwater (FW) and seawater (SW) and during transitions between the two extremes. In FW,  
57 hyper-osmoregulatory mechanisms involve active ion uptake in the gill and excretion of copious  
58 amounts of hypotonic urine in order to compensate for passive ion loss to and water load from the  
59 environment. In SW, drinking and intestinal absorption of hyper-isotonic salt water in combination  
60 with branchial excretion of monovalent ions comprise the general hypo-osmoregulatory  
61 mechanisms that compensate for passive dehydration and ion-load from the environment. Most  
62 studies have focused on the pathways of ionic regulation involving membrane bound ion-channels, -  
63 exchangers, active mechanisms and intercellular tight junctions, which has given rise to advanced  
64 diagrams of the molecular pathways involved in ion transport (see Grosell 2011; Hwang *et al.*,  
65 2011). Much less attention has been paid to the molecular pathways involved in the exchange of  
66 water across epithelial barriers.

67 Theoretically, water may pass epithelia such as the intestinal mucosa by three pathways: simple  
68 diffusion through lipid bilayers, paracellular diffusion through apical tight junctions, or transcellular  
69 passage mediated by specific carriers such as aquaporins or alternative proteins such as the sodium-  
70 glucose transporter (Loo *et al.*, 2002) or the  $\text{Na}^+, \text{K}^+, 2\text{Cl}^-$ -cotransporter (Hamann *et al.*, 2005).  
71 Irrespective of mechanism, there is consensus that water is transported by solute-linked transport  
72 based on Diamond and Bossert's (1967) "standing gradient model" (Larsen and Møbjerg, 2006).  
73 This means that a local osmotic gradient needs to be established in order to drive the flux of water,  
74 and that the  $\text{Na}^+, \text{K}^+$ -ATPase is an important component of this by its contribution to NaCl  
75 accumulation in the lateral intercellular space. SW-acclimation in fishes is associated with increased  
76 drinking, esophageal or intestinal desalination and subsequent isotonic intestinal water absorption  
77 (Grosell, 2011). Most current evidence points to a transcellular route for water absorption (Sundell  
78 and Sundh, 2011; Wood and Grosell, 2012).

79 Our knowledge about aquaporins in fish is still rather fragmentary and gathered from a few steno-  
80 and euryhaline species. In the genome of the stenohaline FW zebrafish, *Danio rerio*, 11 aquaporin

81 subfamilies are present, representing mammalian isoforms AQP0-1, 3-5 and 7-12. Some of these  
82 have duplicate or triplicate paralogs leading to a total of 18 paralogs (Cerdà and Finn, 2010). Thus  
83 the situation in fishes is quite a bit more complex than in mammals, where 13 isoforms (AQP0-12)  
84 are present, each represented by only one paralog (King *et al.*, 2004). Tetrapod aquaporin proteins  
85 may generally be divided into 3 subfamilies based on their transport characteristics: true water  
86 permeable aquapores (AQP0-2,4-6,8), the aqua-glyceropores (AQP3,7,10) with additional  
87 permeabilities to glycerol and urea and the unorthodox or super-aquaporins (AQP11-12), with yet  
88 poorly defined permeability characteristics. When comparing different teleosts, several aquaporin  
89 paralogs are associated with the gastro-intestinal tissues: Aqp1aa/ab, -3a, -4, -7, -8aa/ab, -10a/b, -  
90 11b and -12 (see Cerdà and Finn, 2010); but at closer look only Aqp1aa/ab, and -8ab have been  
91 convincingly demonstrated in the mucosal, enterocytic cell layer of various teleosts (Atlantic  
92 salmon, *Salmo salar*: Madsen *et al.*, 2011; European eel, *Anguilla anguilla*: Martinez *et al.*, 2005;  
93 Japanese eel, *A. japonica*: Aoki *et al.*, 2003; gilthead seabream, *Sparus aurata*: Raldúa *et al.*, 2008).  
94 All other paralogs have either not been investigated yet or identified in other cell types. The  
95 contribution of aquaporins to intestinal water transport in fishes has only been little studied. In most  
96 species investigated (Japanese and European eel, Atlantic salmon, sea bream, European sea bass  
97 (*Dicentrarchus labrax*) SW-acclimation is accompanied by increased expression of these paralogs,  
98 suggesting a role in creating the transcellular water absorption pathway (Aoki *et al.*, 2003; Martinez  
99 *et al.*, 2005; Giffard-Mena *et al.*, 2007, 2008; Raldúa *et al.*, 2008; Tipsmark *et al.*, 2010b). Due to  
100 the variety of paralogs present in teleosts, there is a need to systematically investigate the dynamics,  
101 localization and properties of each in order to understand their role in transcellular water transport  
102 vs. cellular volume regulation. There is also a need to include alternative euryhaline species to  
103 unravel general as well as species-specific patterns. On such species is the Japanese medaka  
104 (*Oryzias latipes*; Inoue and Takei, 2003). It belongs to the family of Ricefishes (*Adrianichthyidae*;  
105 Order: *Beloniformis*) and has been used in several genetic and developmental studies (Ishikawa,  
106 2000). Some of its advantages are: it is a highly euryhaline FW teleost (Sakamoto *et al.*, 2001); it is  
107 a small fish, relatively easy to breed and rear, and its genome is fully sequenced, annotated and is  
108 relatively small (800 Mb) compared to other model species (Tanaka, 1995). Thus, this species is  
109 well suited for genetic manipulation experiments including transgenic and knock-down techniques.  
110 An additional advantage is the presence of 30 related species for phylogenetic comparisons of the  
111 development of salinity tolerance ([www.fishbase.org/](http://www.fishbase.org/)). The Japanese medaka can handle direct  
112 transfer from FW to 30 ppt SW and regain osmotic homeostasis after less than 1 day (Sakamoto *et*

113 *al.*, 2001; Kang *et al.*, 2008), even though step-wise transfer to brackish water may increase its  
114 performance prior to transfer to full strength SW (Inoue *et al.*, 2003). Gill Na<sup>+</sup>,K<sup>+</sup>-ATPase  
115 abundance and gill filament chloride cell density and size is higher in SW than FW (Sakamoto *et*  
116 *al.*, 2001; Kang *et al.*, 2008), and medaka larvae increased drinking rate when transferred from FW  
117 to 80% SW (Kaneko and Hasegawa, 1999). Thus the available information suggests that Japanese  
118 medaka responds to salinity change mostly similar to other well-described euryhaline teleosts.  
119 However, in order to fully benefit from the advantages of using medaka as a euryhaline model fish  
120 and to apply more advanced molecular techniques, there is a need to gather information on  
121 transcriptomic and proteomic aspects of osmoregulation.

122 Our objective was to first characterize and compare the tissue expression pattern of aquaporin  
123 paralogs suspected to be involved in osmoregulation in the Japanese medaka. With focus on the  
124 intestine, we then wanted to characterize aquaporin expression dynamics in fish acclimating  
125 between FW and SW. Based hereupon we developed homologous antibodies to those aquaporins  
126 showing a salinity response and characterized the dynamics and localization in the intestine also at  
127 the protein level. Our working hypothesis was that selected aquaporins become functionally more  
128 abundant in the intestine, when fish are moved to a hyperosmotic medium.

129

## 130 **Results**

### 131 *Aquaporin and NKCC2 transcript tissue distribution.*

132 The transcripts of seven aquaporin paralogs were analyzed in 9 different tissues in long-term FW-  
133 and SW-acclimated medaka (Fig. 1). All paralogs were ubiquitously expressed (above detection  
134 level) in both osmoregulatory and non-osmoregulatory tissues. However, there were major  
135 differences in expression levels among tissues (range of the observed Ct values was: Aqp1a: 20-29,  
136 Aqp3a: 18-30, Aqp7: 23-31, Aqp8ab: 22-33; Aqp10a: 19-34; Aqp10b: 22-30; Aqp11: 24-27).  
137 *aqp1a*: Highest expression in intestine, spleen and kidney followed by muscle, liver and brain.  
138 *aqp3a*: Highest expression in skin, followed by gill and muscle. *aqp7*: Highest expression in liver,  
139 followed by spleen, intestine and gonad. *aqp8ab*: Highest expression in intestine, more than 40x  
140 higher than spleen, gill and additional tissues. *aqp10a*: Highest expression in intestine, more than  
141 40x higher than liver, brain. *aqp10b*: Highest expression in intestine, roughly 10x or more than in  
142 all other tissues. *aqp11a*: Relatively ubiquitous distribution. *NKCC2*: Almost exclusively expressed  
143 in intestine and kidney.

144 Salinity affected the expression level in several cases (Fig. 1): *aqp1a*: Lower level in SW intestine  
145 (1/5x) and skin (1/3x), than in corresponding FW samples. *aqp3a*: Lower level in SW skin (1/3x),  
146 gonad (1/7x) and gill (1/8x) compared to FW samples. *aqp8ab*: Lower level in SW intestine (1/5x)  
147 and liver (1/5x) than in FW samples. *aqp10a*: Lower level in SW intestine (1/80x) and liver (1/75x)  
148 than in FW samples; higher level in SW gill (8x) than in FW samples. *NKCC2*: Higher level in SW  
149 intestine (>5x) and gonads (>45x) than in FW samples; lower level in SW kidney (1/5x) than in FW  
150 samples.

151

### 152 *Short term salinity transfer experiments*

153 *FW-SW-transfer*: Muscle water decreased 24 h after FW-SW transfer but was re-established after  
154 72 h (Fig. 2H). In the intestine, SW-transfer induced a consistent overall decrease in the transcript  
155 level of *aqp1a*, -7, -8ab and -10a, whereas *aqp3a*, -10b and -11a levels were unaffected (Fig. 2).  
156 Furthermore, the transcript level of six isoforms of the Na<sup>+</sup>,K<sup>+</sup>-ATPase  $\alpha$ -subunit were investigated  
157 in the intestine (Fig. 3). Only the  $\alpha$ 2-subunit showed an overall response to salinity and was lower  
158 in SW than in FW. The remaining isoforms showed either no response, a time effect and/or a time x  
159 salinity interaction. The NKCC2 showed a strong increase after SW-transfer (Fig- 3G) whereas the  
160 SGLT1 showed a time effect.

161 *SW-FW-transfer*: Muscle water did not respond to SW-FW transfer within the time frame of  
162 sampling (Fig. 4H). In the intestine, FW-transfer induced a consistent overall increase in the  
163 transcript level of *aqp1a*, -8ab and -10a, whereas *aqp3a*, -7, -10b and -11a were unaffected (Fig. 4).  
164 None of the Na<sup>+</sup>,K<sup>+</sup>-ATPase alpha subunit isoforms responded consistently to the transfer (Fig. 5).  
165 The NKCC2 on the other hand showed a strong and lasting decline after transfer to FW (Fig. 5G).  
166 The SGLT1 did not respond to the transfer (Fig. 5H).

167

### 168 *Western blotting and antibody validation*

169 Western blots of intestinal membrane fractions probed with Aqp1a, -8ab and -10a affinity purified  
170 antibodies revealed immunoreactive bands around 25, 28 and 35 kDa, respectively (Fig. 6). For  
171 Aqp8ab there were two additional bands around 30-35 kDa. For all three antibodies, neutralization  
172 with 400-fold molar excess of the respective antigenic peptide blocked the immunoreactivity band.  
173 Semi-quantitative Western blotting revealed that Aqp1a and -10a protein levels in intestinal  
174 membrane fractions from SW-acclimated fish were significantly lower than the level in

175 corresponding FW samples (Fig. 8). By comparison, there was no difference in the level of Aqp8ab  
176 protein between FW and SW samples.

177

### 178 *Immunofluorescence microscopy*

179 All three aquaporin antibodies gave a distinct and almost exclusive apical - presumably brush  
180 border staining of intestinal tissue of FW fish (Fig. 8-10, red color). Even though the staining  
181 intensity varied slightly along the brush border it appeared very similar for the three antibodies.  
182 There was very little and only sporadic staining of the intracellular compartment with any Aqp  
183 antibody. The apical staining was absent (Aqp10a), much reduced or withdrawn to the cytosolic  
184 compartment (Aqp1a and Aqp8ab) when analyzing SW-acclimated fish. The  $\alpha 5$  Na<sup>+</sup>,K<sup>+</sup>-ATPase  
185 alpha subunit antibody (green color) produced lateral and basolateral staining typical of  
186 membranous enterocytic cells. This staining was absent from the apical brush border and cytosolic  
187 part of the cells. There was no obvious difference in staining intensity when comparing FW and SW  
188 fish.

189

### 190 *Electrophysiology*

191 The transepithelial resistance (TER) of the intestine was generally very low (3-12  $\Omega$ \*cm<sup>2</sup>, Table 1).  
192 There was no effect of acclimation salinity on TER but there was a significant effect of region with  
193 the anterior segments having a higher TER than the posterior segments.

194

## 195 **Discussion**

196 In the genome of the Japanese medaka we identified 13 annotated sequences of aquaporin paralogs  
197 (Tingaud-Sequeira *et al.*, 2010): Aqp0a, -0b, -1a, -3a, -4, -7, -8ab, -9, -10a, -10b, -11a, 11b and -12.  
198 This is less than the 18 paralogs found in zebrafish, which was expected due to the much smaller  
199 genome of medaka compared to zebrafish. All 13 medaka sequences were previously shown in a  
200 phylogenetic analysis to group with the related and cloned paralogs from several other teleosts  
201 including zebrafish (Tingaud-Sequeira *et al.*, 2010) and the marine medaka, *O. dancena* (Kim *et al.*,  
202 2014). We investigated the tissue distribution and salinity response of seven of these (*aqp1a*, -3a, -  
203 7, -8ab, -10a, -10b, -11a), based on our expectation of a particular role in water transport in the  
204 intestine and other osmoregulatory tissues. Our data show that most paralogs are expressed in many  
205 tissues, even though in some cases there is a pronounced (100-1000 fold) difference in the transcript  
206 level. Thus aquaporins are not confined to osmoregulatory tissues but may also occur relatively

207 highly expressed in liver, spleen, skin and gonadal tissue. Some aquaporin transcripts responded  
208 strongly to ambient salinity both in short- and long-term experiments. This was predominant in the  
209 intestine but also in skin, gill and liver, whereas none of the paralogs respond to salinity in the  
210 kidney. A remarkable finding of the study is that three of the predominant paralogs in the intestine  
211 (Aqp1a, -8ab, and -10a) decrease when fish were transferred to a hyperosmotic medium, which is  
212 opposite to our hypothesis and to most other studies of euryhaline fishes. This finding is a challenge  
213 to the paradigm for how intestinal water absorption occurs in SW-acclimated fishes.

214

#### 215 *Tissue distribution of aquaporins and NKCC2*

216 Several studies reported on expression and modulation by salinity of aquaporins in teleost  
217 osmoregulatory tissues (see Cerda and Finn, 2010). However, information on AQP expression in  
218 non-osmoregulatory tissues is limited. AQP1 is a true water pore, and is the most ubiquitously  
219 expressed aquaporin in mammals (Ishibashi *et al.*, 2009). In Japanese medaka, *aqp1a* was most  
220 abundant in the intestine, spleen and kidney but also present at lower levels in all other tissues  
221 examined, which in part may reflect its general expression in erythrocytes and endothelial barriers  
222 (Mobasher and Marples, 2004). This ubiquitous tissue distribution is in accordance with zebrafish,  
223 sea bream, Atlantic salmon and European eel, and marine medaka (Fabra *et al.*, 2005; Martinez *et*  
224 *al.*, 2005; Tingaud-Sequeira *et al.*, 2010; Tipsmark *et al.*, 2010b; Kim *et al.*, 2014). The role of  
225 Aqp1a in osmoregulatory tissues is most likely linked to transepithelial water transport, whereas its  
226 physiological role in other tissues is unknown. Aquaporins in the spleen have been speculated to be  
227 involved in the trafficking of hemopoietic cells (Tyagi and Tangevelu, 2010).

228 *aqp3a*, an aqua-glyceropore, was present at highest levels in skin and gill, which was also the case  
229 in tilapia (*Oreochromis mossambicus*: Watanabe *et al.*, 2005) and in marine medaka (Kim *et al.*,  
230 2014). In these two tissues, both directly exposed to the external medium, the transcript level was 8-  
231 10-fold higher in FW than in SW. Interestingly, in mammals AQP3 is localized in the basal  
232 epidermal cell layer, where it has been proposed a role in skin hydration via its glycerol transporting  
233 properties (see Hara-Chikuma and Verkman, 2006). A relatively high level was also found in  
234 muscle, in accordance with Atlantic salmon and marine medaka (Tipsmark *et al.*, 2010b; Kim *et al.*,  
235 2014) but at variance with mammals, where AQP3 is not expressed in muscle (Ishibashi *et al.*,  
236 2009). The overall tissue distribution in Japanese medaka is well in accordance with that reported in  
237 zebrafish (Tingaud-Sequeira *et al.*, 2010) and tilapia (Watanabe *et al.*, 2005). In the gill, Aqp3 has  
238 been localized specifically in the basolateral membrane of chloride cells in the European eel



239 (*aqp3b*: Cutler and Cramb, 2002; Lignot *et al.*, 2002), Japanese eel (Tse *et al.*, 2006), sea wrasse  
240 (*Coris julis*: Brunelli *et al.*, 2010), sea bass (Giffard-Mena *et al.*, 2007, 2008), silver sea bream (*S.*  
241 *sarba*: Deane and Woo, 2006), tilapia (*aqp3a*: Watanabe *et al.*, 2005) and killifish (*Fundulus*  
242 *heteroclitus*: Jung *et al.*, 2012), where the mRNA level is higher in FW than SW-acclimated fish,  
243 thus in accordance with our data. The localization in the basolateral membrane agrees with its  
244 proposed role as an osmosensor involved in cellular volume regulation. In contrast, the *aqp3b*-like  
245 paralog was recently found to be higher expressed in SW than in FW-acclimated parr gills of  
246 sockeye salmon (*Oncorhynchus nerka*: Choi *et al.*, 2013). This salinity response was, however,  
247 opposite at the smolt stage.

248 The aqua-glyceropore *aqp7* had the highest expression in liver followed by intestine, spleen and  
249 gonadal tissue. The high expression in liver suggests an important role in hepatocyte glycerol  
250 metabolism. Among fishes, this paralog has only been reported in zebrafish, where the transcript  
251 was present in intestine, gonads, gills, kidney and skin but absent in the liver as judged by RT-PCR  
252 (Tingaud-Sequeira *et al.*, 2010). In mammals, AQP7 has a relatively narrow tissue distribution, and  
253 focus has been on the role as a glycerol channel in association with adipose and liver tissue  
254 (Rodríguez *et al.*, 2011). AQP7 is also expressed in the apical brush border of the rat small  
255 intestine, where it may have a role in water movement in the apical domain of enterocytes  
256 (Laforenza *et al.* 2005); in the apical membrane of rat proximal straight tubules, where its role may  
257 be in water absorption or urea secretion, thus participating in the concentrating mechanism of the  
258 mammalian kidney (Ishibashi *et al.*, 2000a); and finally, AQP7 was localized in the plasma  
259 membrane of skeletal muscle fibers (Wakayama *et al.*, 2004), where its function is yet unknown.

260  
261 *aqp8ab* is one of several *aqp8* paralogs that has been reported in fish, though in most cases it is  
262 unclear which paralog is reported: Japanese eel *aqp8aa*-like (Kim *et al.*, 2010), zebrafish *aqp8aa*, -  
263 *8ab*, -*8b* (Tingaud-Sequeira *et al.*, 2010), sockeye salmon *Aqp8b*-like (Choi *et al.*, 2013), Atlantic  
264 salmon *aqp8aa*, -*8ab*, -*8b* (Engelund *et al.*, 2013). In Japanese medaka, only the *Aqp8ab* paralog is  
265 present in the genome and it is predominantly expressed in the intestine. This is in accordance with  
266 Atlantic salmon, where *aqp8ab* is exclusively expressed throughout the intestine and with zebrafish,  
267 where the paralog is also strongly expressed in the kidney. In the related marine medaka, *aqp8(ab)*  
268 is expressed in intestine but also at relatively high levels in spleen, kidney, and heart (Kim *et al.*,  
269 2014). In zebrafish and Atlantic salmon *Aqp8ab* is permeable to water and urea, and in the salmon  
270 it has additional permeability to glycerol, which has not yet been reported in any other species

271 (Tingaud-Sequeira *et al.*, 2010; Engelund *et al.*, 2013). In these species at least two additional Aqp8  
272 paralogs exist: Aqp8aa and Aqp8b, with different tissue distribution and transporting capacities  
273 compared with Aqp8ab (Engelund *et al.*, 2013). In mammals the AQP8 ortholog is expressed in  
274 proximal kidney tubules, hepatocytes, testes, salivary gland and intestine (Elkjær *et al.*, 2001). In  
275 some species it is permeable to urea (Ma *et al.*, 1997) and ammonia (Saparov *et al.*, 2007) in  
276 addition to water but its transport capacity is still debated.

277 AQP10 is an aqua-glyceropore, which is almost exclusively expressed in regions of the gastro-  
278 intestinal tract in human (Hatakeyama *et al.*, 2001; Ishibashi *et al.*, 2002). Its subcellular  
279 localization is controversial (Hatakeyama *et al.*, 2001; Ishibashi *et al.*, 2002; Mobasher *et al.*, 2004;  
280 Li *et al.*, 2005; Laforenza *et al.*, 2010), and surprisingly, it is a pseudogene in mouse (Morinaga *et al.*  
281 *et al.*, 2002). The AQP10 protein was reported in the brush-border membrane of absorptive  
282 enterocytes of the upper villus (Mobasher *et al.*; 2004; Laforenza *et al.*; 2010), whereas other  
283 authors have demonstrated the presence of two AQP10 isoforms, one located in gastro-entero-  
284 pancreatic endocrine cells and another truncated form (named AQP10v), in capillary endothelial  
285 cells of villi (Li *et al.*, 2005). In humans, zebrafish and eel the ortholog is permeable to water,  
286 glycerol and urea (Ishibashi *et al.*, 2002; MacIver *et al.*, 2010; Tingaud-Sequeira *et al.*, 2010).  
287 Recently, it was also found in human adipocytes, where it is co-expressed with two other  
288 glyceropores, AQP3 and -7 (Rodríguez *et al.*, 2011; Laforenza *et al.*, 2013), and may have a major  
289 role in glycerol metabolism. In the Japanese medaka, two paralogs are present: *aqp10a* and *-10b*.  
290 Both had a relatively narrow tissue distribution most highly expressed in intestine and liver, the  
291 latter suggests an important role in glycerol metabolism. In zebrafish, both paralogs are also  
292 present: *aqp10a* in the intestine, liver, kidney and gill (Tingaud-Sequeira *et al.*, 2012), *aqp10b* in  
293 the intestine, kidney (sea bream: Santos *et al.*, 2004; eel: Martinez *et al.*, 2005; Atlantic salmon:  
294 Tipsmark *et al.*, 2010b) and gonads (zebrafish: Tingaud-Sequeira *et al.*, 2010). In the marine  
295 medaka an *aqp10a*-like paralog was reported at relatively high levels in the intestine, ovary, kidney  
296 and gill but at very low levels in the liver (Kim *et al.*, 2014). The Aqp10b paralog present in sea  
297 bream and eel does not seem to play a role in transepithelial water transport as it is expressed  
298 mainly in cell layers below the apical enterocytes (Santos *et al.*, 2004) and is unresponsive to  
299 salinity (Martinez *et al.*, 2005). In salmon, *aqp10b* increased after SW-transfer in the middle  
300 intestine (Tipsmark *et al.*, 2010b). In contrast, the present study suggests that the alternative  
301 paralog, Aqp10a, has an important role in water transport, since it was strongly expressed in  
302 enterocytes and localized in the brush border membrane.

303 AQP11 belongs to the subfamily of unorthodox aquaporins with divergent NPA motifs. Its transport  
304 properties are controversial, even though low water transport has been reported (Yakata *et al.*,  
305 2007). In Japanese medaka, *aqp11a* had a ubiquitous tissue distribution like in the marine medaka  
306 (Kim *et al.*, 2014) with somewhat higher levels in the intestine, liver and kidney. In zebrafish,  
307 *aqp11b* was found only in the gastro-intestinal tract, ovary and liver and absent in kidney (Tingaud-  
308 Sequeira *et al.*, 2010). In rat, AQP11 also has a broad tissue distribution (Ishibashi *et al.*, 2000b)  
309 and is localized intracellularly, most likely in association with the endoplasmic reticulum and  
310 derived vesicles with a suspected role in vesicular or vacuolar water transport (Morishita *et al.*,  
311 2005). Morpholino knock-down of *aqp11* in developing zebrafish embryos causes malformation of  
312 the normal linear body shape (Ikeda *et al.*, 2011), suggesting a crucial role in morphogenesis.

313 Two distinct isoforms of NKCC cotransporters (NKCC1 and NKCC2) have been cloned from  
314 mammals and fish (Russell, 2000). NKCC1, generally called the secretory isoform, is considered a  
315 house-keeping transporter in many cell types (Isenring *et al.*, 1998) and is localized in the  
316 basolateral membrane of secretory epithelial cells such as the SW gill chloride cells (Evans *et al.*,  
317 2005). We analysed NKCC2, an absorptive-type cotransporter, which is located apically in kidney  
318 tubule cells and enterocytes of mammals (Lytle *et al.*, 1996, Xue *et al.*, 2009), where it is  
319 responsible for a significant proportion of apical sodium absorption. In accordance with marine  
320 medaka (Kang *et al.*, 2010), the expression of NKCC2 in Japanese medaka was several-fold higher  
321 in kidney and intestine than in any other tissue analyzed. Furthermore, the transcript increased in  
322 the kidney in FW and in the intestine in SW in line with its recognized role in hypo-tonic urine  
323 production in FW and intestinal salt absorption in SW, respectively. The absorptive isoform,  
324 NKCC2, has been found in the intestine and kidney of many teleosts (winter flounder,  
325 *Pseudopleuronectes americanus*: O'Grady *et al.*, 1986; Olive flounder, *Paralichthys olivaceus*:  
326 Kim *et al.*, 2013; rainbow trout, *O. mykiss*, Aguenaou *et al.*, 1989; eel Cutler and Cramb, 2002;  
327 Watanabe *et al.*, 2011). In addition to its main function as carrier of Na<sup>+</sup>, K<sup>+</sup> and Cl<sup>-</sup> transport, the  
328 NKCC1 isoform may also transport significant amounts of water (Hamann *et al.*, 2005).

329 Another potential route for water entry across the apical membrane is the sodium/glucose  
330 cotransporter SGLT1, which has been proposed to be a low conductance water channel (Loo *et al.*,  
331 1996, 1999). This transporter is present in the apical brush border of rainbow trout (Polakof *et al.*,  
332 2010) and Atlantic salmon intestine (Madsen *et al.*, 2011), where its inhibition with phloridzin

333 reduced water transport by 20%. The SGLT1 was also expressed in the medaka intestine but did not  
334 show any consistent response to environmental salinity in the present study.

335

336 *Aquaporin localization, abundance and response to environmental salinity.*

337 Antibodies were generated against the three abundant intestine aquaporins -1a, -8ab and -10a,  
338 which all showed a marked decrease in SW at the transcript level. The three antibodies identified  
339 protein bands around 25, 30 and 32 kDa, respectively in addition to a duplet around 30-35 kDa in  
340 the case of Aqp8ab. These molecular weights match the expected native molecular weights of 25.1,  
341 27.3 and 27.9 kDa for the three aquaporins. The additional duplet may represent glycosylated forms  
342 as reported for other aquaporins (Hendriks *et al.*, 2004; Pandey *et al.*, 2010). The successful  
343 blocking of these bands with the respective antigenic peptides validated the specificity of the  
344 antibodies.

345 All three antibodies gave strong immunostaining of the apical region of enterocytes in FW-  
346 acclimated medaka. The staining pattern was more or less identical for the three antibodies,  
347 suggesting that Aqp1a, -8ab and -10a are all expressed in the apical brush border of the intestine.  
348 For unknown reasons, the staining of Aqp8ab was more variable along the brush border than in the  
349 case of Aqp1a and -10a. As expected, the alpha-5 antibody produced a strong staining of basolateral  
350 membranes indicative of the abundance of Na<sup>+</sup>,K<sup>+</sup>-ATPase enzyme. There was no sign that this  
351 staining intensity was altered by salinity. According to "the standing gradient model" (Larsen and  
352 Møbjerg, 2006), the Na<sup>+</sup>,K<sup>+</sup>-ATPase is the primary driving force for water transport, which is  
353 tightly linked to the creation of ionic and osmotic gradients between the lumen and the lateral  
354 intercellular space. There was a remarkable decrease in the apical brush border staining for  
355 aquaporins, when medakas were acclimated to SW, indicating that the aquaporin proteins were  
356 removed from the apical membrane. Retraction from the membrane was accompanied by a more  
357 pronounced cytosolic staining in the apical region of enterocytes, especially for Aqp1a and -8ab,  
358 suggesting that an internalization of apical membrane domains took place. This observation was  
359 supported by the reduced abundance of Aqp1a and -10a in intestinal membrane fractions from SW  
360 fish when assayed by Western blotting, and was in line with the much reduced transcript levels of  
361 the two aquaporins during acclimation from FW-SW. Aqp8ab on the other hand declined at the  
362 transcript level and also disappeared from the apical membrane in SW; however, total Aqp8ab  
363 abundance did not change in Western analysis, suggesting that both apical and internalized pools of  
364 Aqps were estimated to some degree in the procedure. The removal or internalization of aquaporins

365 from the apical brush border upon SW-acclimation is surprising, and in contrast to most other  
366 studies of aquaporin dynamics in euryhaline fish. In Atlantic salmon (Engelund *et al.*, 2013), eel  
367 (Aoki *et al.*, 2003; Martinez *et al.*, 2005), sea bass (Giffard-Mena *et al.*, 2007, 2008) and sea bream  
368 (Raldúa *et al.*, 2008) Aqp1 and -8ab paralogs have been shown to increase in intestinal segments,  
369 when fish are acclimated to SW, an observation which is functionally linked to the increased water  
370 transport capacity and increased drinking in SW-acclimated fish. Recently, however, decreased  
371 intestinal mRNA levels of *aqp8* and *-10* were reported in a related species, the marine medaka (Kim  
372 *et al.*, 2014). In one other species, the Black porgy, *Acanthopagrus schlegeli*, *aqp1a* mRNA levels  
373 were reported to be higher in FW than in SW (An *et al.*, 2008).

374 There is not much known about drinking behavior of the adult Japanese medaka or related species.  
375 Only a single study reported drinking dynamics, and found that even though more water was  
376 imbibed in 80% SW larvae than in FW, there was a significant drinking activity also in FW  
377 individuals (Kaneko and Hasegawa, 1999). When inspected upon dissection, we saw unequivocal  
378 evidence of drinking in adult medaka in SW. Yellow-whitish precipitates, presumably made of  
379  $\text{Ca}^{2+}$ - and  $\text{Mg}^{2+}$ -carbonates (Grosell, 2011), appeared already 24 hours after SW-transfer in support  
380 of water absorption and bicarbonate secretion. Very little fluid appeared in the lumen of FW  
381 intestines.  $\text{Na}^+$ ,  $\text{K}^+$ -ATPase  $\alpha$ -subunit transcripts were unaffected by salinity, contrasting several  
382 other reports of higher  $\text{Na}^+$ ,  $\text{K}^+$ -ATPase expression and activity in the intestine of SW-teleosts  
383 (Grosell, 2011); however, the marked increase in the NKCC2 transcript level in SW, suggests that  
384 increased salt transport is indeed taking place, and may be linked to increased water absorption. On  
385 the other hand, the decreasing aquaporin level contradicts increased transcellular water transport,  
386 and it is therefore puzzling at this moment, how water absorption takes place across the intestinal  
387 barrier in the medaka. One possibility is that paracellular water transport may exceed transcellular  
388 water transport. This would require a rearrangement of the tight junction apparatus with its  
389 associated junctional proteins, and opens an interesting area for future research. To this end claudin-  
390 2 has been suggested to create a water pore, since it increases water permeability when over-  
391 expressed in MCDK C7 epithelial monolayers (Rosenthal *et al.*, 2010). The increased level of  
392 NKCC2 may then benefit apical  $\text{Na}^+$  uptake directed for secretion into the lateral intercellular  
393 space.

394 Only a few studies have enlightened the molecular pathways for water transport across the teleost  
395 intestine. Recent evidence showed that transcellular water transport is predominating in SW-  
396 acclimated salmonids (Sundell and Sundh, 2011), as the paracellular permeability of the intestine is

397 reduced upon SW-acclimation together with an increased transepithelial electrical resistance (TER).  
398 Transcellular water absorption was further supported by a recent study of polyethyleneglycol (PEG)  
399 permeability in the killifish intestine (Wood and Grosell, 2012). On the contrary, we did not find  
400 evidence of an alteration in TER of the intestine related to salinity. The resistance was generally  
401 low compared to other investigations (Grosell *et al.*, 2009; Sundell and Sundh, 2011), which  
402 suggests that the paracellular permeability is quite high in both FW and SW, and supports a  
403 paracellular transport route. The study gives rise to the intriguing question why such redundant  
404 abundance of three aquaporin paralogs is present in FW medaka intestines - all of which are  
405 predominantly expressed in the apical brush border? Aqp1a is a true water pore, Aqp10a  
406 presumably has additional permeability to glycerol, whereas the permeability properties of medaka  
407 Aqp8ab are unknown at present but may include urea and glycerol as shown in salmon (Engelund *et*  
408 *al.*, 2013). Thus at least Aqp8ab and -10a may be involved in metabolism of glycerol and other  
409 small solutes linked to digestive processes. A nearby speculation based on our data is that FW  
410 medakas absorb significant amounts of water in their intestine, which appears contradictory to the  
411 general consensus regarding hyperosmoregulatory mechanisms in teleosts. Feeding fish may  
412 swallow water in association with food intake but the fate of any imbibed water has not been  
413 studied in detail. Furthermore, fish in our study were non-fed, and drinking seems not to be  
414 beneficial for osmoregulatory purposes. A final speculation is that aquaporins may be involved in  
415 fluid secretion in the FW medaka intestine. There is no functional evidence to support this at  
416 present but this has been shown to occur in FW stickleback males during their sexual maturation  
417 when kidney function becomes compromised (De Ruiter, 1980) and in SW killifish intestines, when  
418 intracellular cAMP and Ca<sup>2+</sup> levels are stimulated *in vitro* (Marshall *et al.*, 2002). Irrespective of  
419 direction of transport, basolateral expression of aquaporins still needs to be demonstrated for  
420 transcellular water transport to take place.

421

## 422 **Concluding remarks**

423 This study identified several aquaporin paralogs in Japanese medaka that respond to a changing  
424 osmotic environment in different tissues. Most pronounced changes occurred in the skin and gill  
425 (*aqp3a*) and in the intestine (*aqp1a*, *-8ab* and *-10a*), where the levels were much higher in FW than  
426 SW, the latter three being at both transcript and protein levels. No changes occurred in Na<sup>+</sup>,K<sup>+</sup>-  
427 ATPase  $\alpha$ -subunit expression in the intestine, which is surprising considering its role as a driving  
428 force for generation of osmotic gradients across the intestinal epithelium. On the other hand the

429 absorptive-type NKCC2 cotransporter was much elevated in the SW-intestine, suggesting an  
430 increased apical salt absorptive capacity, when drinking is initiated. The study leaves an open  
431 question about the molecular pathway for transepithelial water absorption in the SW Japanese  
432 medaka intestine. The reduced intestinal aquaporin expression was opposite to our hypothesis,  
433 which was based on the assumption that intestinal water absorption was higher in a hyperosmotic  
434 medium. An alternative model for intestinal water transport must therefore be proposed in the  
435 medaka, with emphasis on the paracellular route compared to other fishes investigated to date, and  
436 efforts should be made to analyse the permeability and water transport characteristics of the medaka  
437 intestine.

438

## 439 **Materials and Methods**

### 440 *Fish and maintenance*

441 Adult Japanese medaka (*Oryzias latipes*, Temminck & Schlegel) were purchased from Aquatic  
442 Research Organism (Hampton, NH) and acclimated to experimental conditions in recirculated  
443 dechlorinated tap water (FW) or artificial 28 ppt seawater (Instant Ocean, United Pet Group,  
444 Blacksburg, VA) at 20 °C for at least 1 month prior to experiments. They were fed 3 times/day with  
445 a mixed diet of Tetraamin tropical flakes (Tetra, United Pet group, Blacksburg, VA) and frozen brine  
446 shrimp (Bay Brand, San Francisco, Newark, CA) except during the short-term salinity transfer  
447 experiments, where food was withheld from one day before and throughout the experiment (3 days).  
448 All handling and experimental procedures were approved by the Animal Care and Use Committee  
449 of the University of Arkansas (IACUC protocol number 11005).

450

### 451 *Experimental setup and sampling*

452 Two experiments were performed: long-term acclimation to FW and SW and short-term transfer  
453 from FW to SW and from SW to FW. In the long-term acclimation experiment, 4 fish (2 males and  
454 2 females) were acclimated to FW and 4 fish to 28 ppt SW for at least 1 month. The fish were  
455 anaesthetized in 100 mg/L tricaine methanesulfonate (MS-222, buffered with NaHCO<sub>3</sub>) and then  
456 killed by cervical dislocation prior to sampling of gill filaments, intestine, kidney, liver, spleen,  
457 gonads, brain, skin, and caudal muscle. Medakas do not have a stomach (Iwamatsu, 2012), so the  
458 entire intestine after the esophagus until the anus was used with fat trimmed off. All tissues were  
459 immediately frozen on dry ice and stored at -80 °C until used.

460 In the short-term time course experiments, medaka (long-term acclimated) were directly transferred  
461 from FW to SW or from SW to FW and then sampled (N=10) after 24 and 72 hours. Parallel groups  
462 were sham-transferred to the original medium and sampled as controls. Prior to sampling, fish were  
463 anaesthetized and killed as described above. The entire caudal peduncle was removed, gently  
464 blotted dry with Kimwipes and the wet weight determined. Dry weight and muscle water content  
465 (%) were determined after drying overnight at 105 °C. The entire intestine was dissected as above  
466 quickly frozen in dry ice.

467

#### 468 *RNA isolation, cDNA synthesis and real-time qPCR*

469 Tissues were homogenized in TRI reagent (Sigma-Aldrich, St. Louis, MO) using a rotating knife  
470 homogenizer, and total RNA was extracted following the manufacturer's protocol. The RNA pellet  
471 was dissolved in nuclease free water and the quantity and purity ( $A_{260}/A_{280}$ ) were estimated using a  
472 NanoDrop spectrophotometer (Thermo Fisher Scientific, Waltham, MA).  $A_{260}/A_{280}$  was generally  
473 >1.90. First strand cDNA synthesis from 1 µg total RNA was performed in a total volume of 20 µL  
474 using Applied Biosystems high capacity cDNA reverse transcription kit (Foster City, CA).  
475 Messenger RNA sequences of the following Japanese medaka target transcripts were identified in  
476 the Ensemble genome browser ([www.ensembl.org/](http://www.ensembl.org/)) and used for primer generation (see Table 2):  
477 *aqp1a*, *aqp3a*, *aqp7*, *aqp8ab*, *aqp10a*, *aqp10b*, *aqp11a*,  $\text{Na}^+, \text{K}^+, 2\text{Cl}^-$ -cotransporter type 2 (NKCC2),  
478  $\text{Na}^+, \text{K}^+$ -ATPase- $\alpha 1a$ , - $\alpha 1b$ , - $\alpha 1c$ , - $\alpha 2$ , - $\alpha 3a$ , - $\alpha 3b$ , sodium/glucose cotransporter type-1 (SGLT1).  
479 Ribosomal protein P0 (*rplp0*),  $\beta$ -*actin* and elongation factor 1-alpha (*EF1 $\alpha$* ) were used for internal  
480 normalisation. All primers were generated using Primer3 software (Koressaar *et al.*, 2007;  
481 Untergrasser *et al.*, 2012). Real-time quantitative PCR was performed using a BioRad CFX96  
482 platform (BioRad, Hercules, CA) and SYBR® Green JumpStart™ Taq ReadyMix™ (Sigma-  
483 Aldrich) in a total volume of 15 µL. Primer concentrations were 150 nM and the thermocycling  
484 protocol consisted of 3 min initial denaturation (94 °C), 40-cycles of denaturation (15 s) +  
485 annealing/elongation (1 min, 60 °C), followed by dissociation curve analysis (5 s/°C, 65-94 °C).  
486 PCR amplification efficiency (84-120%) was analyzed over a 2<sup>8</sup> dilution range and the relative copy  
487 numbers were calculated according to Pfaffl (2001) as:  $C_n = (1+E_a)^{-C_t}$ , where  $C_n$  is the relative copy  
488 number and  $C_t$  is the threshold cycle of the target gene. Corrected expression data for the three  
489 normalisation genes were entered into the geNorm software (Biogazelle, Zwijnaarde, Belgium) and  
490 a geometric mean was calculated and used for normalisation of all expression data. Contamination  
491 of RNA samples with genomic DNA was checked by running qPCR on randomized, diluted RNA



492 samples ('no amplification control'). Amplification in these samples was  $<2^{-8}$  of the corresponding  
493 cDNA sample. Primer-dimer association was checked in 'no template controls' without addition of  
494 cDNA. The molecular size of all amplicons was verified by 2.5% agarose gel electrophoresis.

#### 495 *Primary antibodies*

496 Based on the Ensembl protein sequences of Japanese medaka Aqp1a, -8ab and -10a, we selected  
497 appropriate epitopes for homologous antibody production: Aqp1a: GPVGDYDVNGGNES (c-  
498 terminal, amino acid 240-253); Aqp8ab: VDSALMEKGKKPAAC (n-terminal, amino acid 15-28);  
499 Aqp10a: CLDEKRNTAPPDL (cytosol loop, amino acid 170-183). Affinity purified polyclonal  
500 antibodies were produced in rabbits by GenScript (Piscataway, NJ), validated by Western blotting  
501 and used for immunofluorescence. To detect  $\text{Na}^+, \text{K}^+$ -ATPase we used a monoclonal mouse  
502 antibody recognizing all isoforms of the  $\text{Na}^+, \text{K}^+$ -ATPase  $\alpha$ -subunit ( $\alpha 5$ ; The Developmental Studies  
503 Hybridoma Bank developed under auspices of the NICHD and maintained by The University of  
504 Iowa, Department of Biological Sciences, Iowa city, IA). A mouse monoclonal anti- $\beta$ -actin  
505 antibody was used as loading control (mAbcam 8224; ABCAM, Cambridge, MA).

#### 507 *Western blotting*

508 Western blotting was performed as described previously (Tipsmark *et al.*, 2010a). Intestines from  
509 FW- and SW-acclimated medaka were homogenized in SEID buffer ( $\text{mmol L}^{-1}$ : sucrose 300,  $\text{Na}_2$ -  
510 EDTA 20, imidazole 50, 0.1% sodium deoxycholate, with a protease inhibitor cocktail (P8340;  
511 Sigma-Aldrich) centrifuged at 5,000x g for 10 minutes at 4°C. The supernatant was transferred to a  
512 new tube and centrifuged at 20,000x g for 1 hour at 4°C. The pellet (membrane fraction) was  
513 redissolved in 20  $\mu\text{L}$  of SEID buffer. Protein concentration was evaluated using the Bradford assay.  
514 Samples were mixed with NuPage LDS sample buffer (Life Technologies, Carlsbad, CA) and  
515 added dithiothreitol (50  $\text{mmol L}^{-1}$ ). Samples were heated at 75°C for 10 minutes. Ten  $\mu\text{g}$  of protein  
516 was loaded in all lanes and separated in 4–12% bis-Tris gels and MES/SDS buffer at 200 V (Xcell  
517 II SureLock, Life Technologies). Molecular sizes were estimated by a Novex sharp Pre-Stained  
518 Protein Standard marker (Invitrogen). Following electrophoresis, proteins were electroblotted onto  
519 nitrocellulose membranes (0.20  $\mu\text{m}$ ; Invitrogen) by submerged blotting for 1 h at 30 V (XCell II;  
520 Invitrogen) with transfer buffer (in  $\text{mmol L}^{-1}$ : 25 Tris, 192 glycine, and 20% methanol). Membranes  
521 were blocked in 5% non-fat milk in 1xTBST (in  $\text{mmol L}^{-1}$ : 50 Tris-Cl, 150 NaCl, 0.1% Tween20,  
522 pH 7.5) for 1 hour at 4°C. After blocking, membranes were incubated overnight at 4°C with a  
523 cocktail of two primary antibodies (rabbit anti-Aqp1a 0.24  $\mu\text{g mL}^{-1}$ ; or anti-Aqp8ab 0.51  $\mu\text{g mL}^{-1}$ ;

524 or anti-Aqp10a 0.68  $\mu\text{g mL}^{-1}$ ; and mouse anti- $\beta$ -actin 0.12  $\mu\text{g mL}^{-1}$ ). Following 4x5 min washes in  
525 1xTBST buffer, membranes were incubated with IRDye 800-labeled goat-anti rabbit and IRDye  
526 680-labeled mouse antibodies (LiCor Biosciences, Lincoln, NE) diluted 1:10000, for 45 minutes at  
527 room temperature. Following 4x5 min final washes in 1xTBST, membranes were air dried and  
528 scanned on an infrared imager (Odyssey, Li-Cor Biosciences, Lincoln, NE). The aquaporin band  
529 intensities were quantified using the Image Studio Ver. 2.0 software (LiCor Biosciences) and  
530 normalized to  $\beta$ -actin. In separate experiments, the ability of the antigenic peptides to neutralize the  
531 target protein was validated by pre-incubating the primary antibody with the antigenic peptide in a  
532 400x molar excess overnight at 4°C prior to probing the membrane.

533

### 534 *Immunofluorescence microscopy*

535 Intestines from FW and SW-acclimated medaka were fixed overnight in 4% phosphate-buffered  
536 paraformaldehyde (4°C). Following several rinses in phosphate buffered saline (PBS; in  $\text{mmol L}^{-1}$ :  
537 137 NaCl, 2.7 KCl, 4.3  $\text{Na}_2\text{HPO}_4$ , 1.4  $\text{KH}_2\text{PO}_4$ , pH 7.3) trimmed sub-samples were then infused in  
538 Optimal Cutting Temperature embedding medium (OCT, Sakura® Finetek, AJ Torrance, CA)  
539 overnight at 4°C, frozen in cryo-molds on dry ice and stored at -20°C until sectioned. Cryosections  
540 (8-10  $\mu\text{m}$ ) were prepared on a cryostat HM 525 (Microm International, Walldorf, Germany),  
541 transferred to SuperFrost® Plus microslides and dried at 50°C for 3-4 hours before further use.  
542 Immunostaining was accomplished by the following protocol: 2x5 min washing in PBS; epitope  
543 retrieval by boiling in citrate buffer (10  $\text{mmol L}^{-1}$   $\text{Na}_3\text{C}_6\text{H}_5\text{O}_7$ , pH 6) for 2x5 min, rinsing 5 min in  
544 PBS, blocking in 3% normal goat serum/1% bovine serum albumin in PBS for 1 h and incubation in  
545 a cocktail of two primary antibodies (rabbit anti-Aqp1a, -8ab, -10a at 1-5  $\mu\text{g mL}^{-1}$  and mouse anti-  
546  $\text{Na}^+$ ,  $\text{K}^+$ -ATPase  $\alpha$ -subunit ( $\alpha 5$ ) 0.5  $\mu\text{g mL}^{-1}$ ) in blocking buffer overnight (4°C). The next day the  
547 sections were washed 3x5 min in PBS and incubated for 1-2 h at 37°C with secondary antibodies  
548 (Alexa Fluor 647 conjugated goat-anti rabbit; Oregon green 488 conjugated goat-anti mouse; Life  
549 Technologies). Following washes (3x5 min in PBS, 1x5 min in distilled water) the sections were  
550 mounted with coverslips using Vectashield mounting medium with 4',6-diamidino-2-phenylindole  
551 antifade agent (Vector Laboratories, Burlingame, CA) and examined with a Zeiss Axio Imager M2  
552 microscope (Zeiss, Oberkochen, Germany); pictures were taken with an AxioCam MR  
553 monochrome camera and processed using the Axio Vision 4 software (Zeiss).

554

### 555 *Electrophysiology*

556 The electrophysiological properties of the intestine were investigated by voltage clamping in an  
557 Ussing chamber (Physiological Instruments, San Diego, CA) with identical Ringers' solution on the  
558 serosal and mucosal side (in mmol L<sup>-1</sup>: 140 NaCl, 10 NaHCO<sub>3</sub>, 4 KCl, 2 NaH<sub>2</sub>PO<sub>4</sub>, 1 MgSO<sub>4</sub>, 1  
559 CaCl<sub>2</sub>, 5.5 glucose, pH 7.8). Fish (N=4) acclimated to FW and 28 ppt SW were anaesthetized in  
560 MS-222 and killed by cervical dislocation. The intestine was dissected, fat trimmed away, rinsed in  
561 cold PBS and split into anterior (AI, 2/3) and posterior (PI, 1/3) segments based on visual  
562 appearance. Each segment was cut into appropriate sections to fit the Ussing chamber slider with an  
563 aperture of 0.8 mm<sup>2</sup>. In most cases, the AI gave 3 and the PI 1-2 useful sections per fish. The tissues  
564 were then stored in cold Ringer's until analyzed. The voltage/current (V/I) relationship was  
565 measured immediately after mounting and then again after 5-10 min by clamping the tissue to  
566 alternating DC voltages (0, ±0.5, ±1.0, ±1.5 and ±2.0 mV) and measuring the clamp current  
567 (Sundell and Sundh, 2011). It took 30-40 min to examine all segments in one fish. The  
568 transepithelial resistance (TER, Ω\*cm<sup>2</sup>) was calculated as the slope of the linear regression line of  
569 the V/I relationship.

570

#### 571 *Statistics*

572 Tissue expression data were analyzed by two-way ANOVA. When required, logarithmic  
573 transformation of data was done to meet the ANOVA assumption of homogeneity of variances as  
574 tested by Bartlett's test. When the interaction between factors was significant this was followed by  
575 Tukey's post-hoc analysis and otherwise the overall effects are indicated in the figures. A  
576 significance level of P<0.05 was chosen. All tests were performed using GraphPad Prism 5.0  
577 software (San Diego, CA, USA).

578

#### 579 **Competing interests**

580 The authors declare no competing financial interests.

581

#### 582 **Author contributions**

583 S.S.M. and C.K.T. conceived and designed the experiments. S.S.M performed the experiments and  
584 analyzed the data. J.B. and C.K.T. did the Western analyses. S.S.M. wrote the paper

585

586

587 **Funding**

588 S.S.M. was supported by a grant from the Danish Natural Science Council (09-070689) and by a  
589 visiting professor scholarship from the Fulbright Foundation. C.K.T. received support from the  
590 National Science Foundation (IBN 12-51616) and the Arkansas Biosciences Institute.

591

592 **References**

593 **Aguenaou H., Boeuf G., and Colin, D.A.** (1989). Na<sup>+</sup> uptake through the brush border membranes  
594 of intestine from fresh water and sea-water adapted trout (*Salmo gaidneri*, R.). *J. Comp. Physiol.*  
595 *B: Biochem. Syst. Environ. Physiol.* **159**, 275-280.

596 **Aoki, M., Kaneko, T. Katoh, ., Hasegawa, S., Tsutsui, N. and Aida, K.** (2003). Intestinal water  
597 absorption through aquaporin 1 expressed in the apical membrane of mucosal epithelial cells in  
598 seawater-adapted Japanese eel. *J. Exp. Biol.* **206**, 3495-3505.

599 **An, K.W., Kim, N.N. and Choi, C.Y.** (2008). Cloning and expression of aquaporin 1 and arginine  
600 vasotocin receptor mRNA from the black porgy, *Acanthopagrus schlegeli*: effect of freshwater  
601 acclimation. *Fish Physiol. Biochem.* **34**, 185-194.

602 **Brunelli, E., Mauceri, A., Salvatore, F., Giannetto, A., Maisano, M. and Tripepia, S.** (2010).  
603 Localization of aquaporin1 and 3 in the gills of the rainbow wrasse *Coris julis*. *Acta histochem.*  
604 **112**, 251-258.

605 **Cerdà, J. and Finn, R.N.** (2010). Piscine aquaporins: an overview of recent advances. *J. Exp. Zool.*  
606 **313A**, 623-650.

607 **Choi, Y.J., Shin, H.S., Kima, N.N., Cho, S.H., Yamamoto, Y., Ueda, H., Lee, J. and Choi, C.Y.**  
608 (2013). Expression of aquaporin-3 and -8 mRNAs in the parr and smolt stages of sockeye  
609 salmon, *Oncorhynchus nerka*: Effects of cortisol treatment and seawater acclimation. *Comp.*  
610 *Biochem. Physiol.* **165A**, 228-236.

611 **Cutler, C. and Cramb, G.** (2002). Branchial expression of an aquaporin 3 (AQP-3) homologue is  
612 downregulated in the European eel *Anguilla anguilla* following seawater acclimation. *J. Exp.*  
613 *Biol.* **205**, 2643-2651.

614 **Deane, E.E. and Woo, N.Y.S.** (2006). Tissue distribution, effects of salinity acclimation, and  
615 ontogeny of aquaporin 3 in the marine teleost, Silver Sea Bream (*Sparus sarba*). *Marine Biotech.*  
616 **8**, 663-671.

- 617 **De Ruiter A.J.H.** (1980) Effects of testosterone on kidney structure and hydromineral regulation in  
618 the teleost *Gasterosteus aculeatus* L. Dissertation, State University of Groningen, The  
619 Netherlands.
- 620 **Diamond, J.M. and Bossert, W.H.** (1967). Standing gradient osmotic flow. A mechanism for  
621 coupling of water and solute transport in epithelia. *J. Gen. Physiol.* **50**, 2061–2083.
- 622 **Elkjær, M.L., Nejsum, L.N., Gresz, V., Kwon, T.-H., Jensen, U.B., Frøkiær, J. and Nielsen, S.**  
623 (2001). Immunolocalization of aquaporin-8 in rat kidney, gastrointestinal tract, testis, and  
624 airways. *Am. J. Physiol. (Renal. Physiol.)* **281**, 1047-1057.
- 625 **Engelund, M.B., Chauvigné, F., Christensen, B.M., Finn, R.N., Cerdà, J. and Madsen, S.S.**  
626 (2013). Differential expression and novel permeability properties of three aquaporin 8 paralogs  
627 from seawater-challenged Atlantic salmon smolts. *J. Exp. Biol.* **216**, 3873-3885.
- 628 **Evans, D.H., Piermarini, P.M. and Choe, K.P.** (2005). The multifunctional fish gill: Dominant  
629 site of gas exchange, osmoregulation, acid-base regulation, and excretion of nitrogenous waste.  
630 *Physiol. Rev.* **85**, 97–177.
- 631 **Fabra, M., Raldúa, D., Power, D.M., Deen, P.M.T. and Cerdà, J.** (2005). Marine fish egg  
632 hydration is aquaporin-mediated. *Science* **307**, 545.
- 633 **Giffard-Mena, I., Boulo, V., Aujoulat, F., Fowden, H., Castille, R., Charmantier, G. and**  
634 **Cramb, G.** (2007). Aquaporin molecular characterization in the sea-bass (*Dicentrarchus labrax*):  
635 the effect of salinity on AQP1 and AQP3 expression. *Comp. Biochem. Physiol.* **148A**, 430-444.
- 636 **Giffard-Mena, I., Lorin-Nebel, C., Charmantier, G., Castille, R. and Boulo, V.** (2008).  
637 Adaptation of the sea-bass (*Dicentrarchus labrax*) to fresh water: Role of aquaporins and  
638  $\text{Na}^+/\text{K}^+$ -ATPases. *Comp. Biochem. Physiol.* **150A**, 332–338.
- 639 **Grosell, M.** (2011). Intestinal anion exchange in marine teleosts is involved in osmoregulation and  
640 contributes to the oceanic inorganic carbon cycle. *Acta Physiol.* **202**, 421-434.
- 641 **Grosell, M. Genz, J., Taylor, J.R., Perry, S.F. and Gilmour K.K.** (2009). The involvement of  
642  $\text{H}^+$ -ATPase and carbonic anhydrase in intestinal  $\text{HCO}_3^-$  secretion in seawater-acclimated rainbow  
643 trout. *J. Exp. Biol.* **212**, 1940-1948.
- 644 **Hamann, S., Herrera-Perez, J.J., Bundgaard, M., Leefmans, F.J. and Zeuthen, T.** (2005).  
645 Water permeability of  $\text{Na}^+/\text{K}^+/\text{2Cl}^-$  cotransporters in mammalian epithelial cells. *J. Physiol.*  
646 *London* **568**, 123-135.
- 647 **Hara-Chikuma, M. and Verkman, A.S.** (2006). Physiological roles of glycerol-transporting  
648 aquaporins: the aquaglyceroporins. *Cell. Mol. Life Sci.* **63**, 1386-1392.

- 649 **Hatakeyama, S., Yoshida, Y., Tani, T., Koyama, Y., Nihei, K., Ohshiro, K., Kamiie, J.-I.,**  
650 **Yaoita, E., Suda, T., Hatakeyama, K. and Yamamoto, T.** (2001). Cloning of a new aquaporin  
651 (AQP10) abundantly expressed in duodenum and jejunum. *Biochem. Biophys. Res. Commun.*  
652 **287**, 814-819.
- 653 **Hendriks, G., Koudijs, M., van Balkom, B.W.M., Oorschot, V., Klumperman, J., Deen, P.M.T**  
654 **and van der Sluijs, P.** (2004). Glycosylation is important for cell surface expression of the  
655 water channel aquaporin-2 but is not essential for tetramerization in the endoplasmic reticulum.  
656 *J. Biol. Chem.* **279**, 2975–2983.
- 657 **Hwang, P.P., Lee, T. and Lin, I.** (2011). Ion regulation in fish gills: recent progress in the cellular  
658 and molecular mechanisms. *Am. J. Physiol. (Regul. Integr. Comp. Physiol.)* **301**, R28–R47.
- 659 **Isenring, P., Jacoby, S.C., Payne, J.A. and Forbush III, B.** (1998). Comparison of Na-K-Cl  
660 cotransporters. NKCC1, NKCC2, and the HEK cell Na-K-Cl cotransporter. *J. Biol. Chem.* **273**,  
661 11295-11301.
- 662 **Ikeda, M., Ando, A., Shimono, M., Takamatsu, N., Taki, A., Muta, K., Matsushita, W., Uechi,**  
663 **T., Matsuzaki, T., Kenmochi, N., Takata, K., Sasaki, S., Ito, K. and Ishibashi, K.** (2011).  
664 The NPC motif of aquaporin-11, unlike the NPA motif of known aquaporins, is essential for full  
665 expression of molecular function. *J. Biol. Chem.* **286**, 3342-3350.
- 666 **Inoue, K. and Takei, Y.** (2003). Asian medaka fishes offer new models for studying mechanisms  
667 of seawater adaptation. *Comp. Biochem. Physiol.* **136B**, 635–645.
- 668 **Ishikawa, Y.** (2000). Medakafish as a model system for vertebrate developmental genetics.  
669 *BioEssays* **22**, 487–495.
- 670 **Ishibashi, K., Hara, S. and Kondo, S.** (2009). Aquaporin water channels in mammals. *Clin. Exp.*  
671 *Nephrol.* **13**, 107-117.
- 672 **Ishibashi, K., Imaia, M. and Sasaki, S.** (2000a). Cellular localization of aquaporin 7 in the rat  
673 kidney. *Exp. Nephrol.* **8**, 252-257.
- 674 **Ishibashi, K., Kuwahara, M., Kageyama, Y., Sasaki, S., Suzuki, M. and Imai, M.** (2000b).  
675 Molecular cloning of a new aquaporin superfamily in mammals: AQPX1 and AQPX2. In:  
676 *Molecular biology and physiology of water and solute transport* (ed. S. Hohmann and S.  
677 Nielsen), pp. 123-126. New York: Kluwer Academic/Plenum Publishers.
- 678 **Ishibashi, K., Morinaga, T., Kuwahara, M., Sasaki, S. and Imai, M.** (2002). Cloning and  
679 identification of a new member of water channel (AQP10) as an aquaglyceroporin. *Biochim.*  
680 *Biophys. Acta* **157**, 335- 340.

- 681 **Iwamatsu, T.** (2012). Growth of the Medaka (I) - Formation of vertebrae, changes in blood  
682 circulation, and changes in digestive organs. *Bull. Aichi Univ. Education (Natural Sciences)* **61**,  
683 55-63.
- 684 **Jung, D., Sato, J.D., Shaw, J.R. and Stanton, B.A.** (2012). Expression of aquaporin 3 in gills of  
685 the Atlantic killifish (*Fundulus heteroclitus*): Effects of seawater acclimation. *Comp. Biochem.*  
686 *Physiol.* **161A**, 320-326.
- 687 **Kaneko, T. and Hasegawa, S.** (1999). Application of laser scanning microscopy to morphological  
688 observations on drinking in freshwater medaka larvae and those exposed to 80% seawater.  
689 *Fisheries Sci.* **65**, 492-493.
- 690 **Kang, C.-K., Tsai, H.-J., Liu, C.-C., Lee, T.-H. and Hwang, P.-P.** (2010) Salinity-dependent  
691 expression of a Na<sup>+</sup>, K<sup>+</sup>, 2Cl<sup>-</sup> cotransporter in gills of the brackish medaka *Oryzias dancena*: A  
692 molecular correlate for hyposmoregulatory endurance. *Comp. Biochem. Physiol.* **157A**, 7-18.
- 693 **Kang, C.-K., Tsai, S.-C., Lee, T.-H. and Hwang, P.P.** (2008). Differential expression of branchial  
694 Na<sup>+</sup>/K<sup>+</sup>-ATPase of two medaka species, *Oryzias latipes* and *Oryzias dancena*, with different  
695 salinity tolerances acclimated to fresh water, brackish water and seawater. *Comp. Biochem.*  
696 *Physiol.* **151A**, 566–575.
- 697 **Kim, Y.K., Lee, S.Y., Kim, B.S., Kim, D.S., Nam, Y.K.** (2014). Isolation and mRNA expression  
698 analysis of aquaporin isoforms in marine medaka *Oryzias dancena*, a euryhaline teleost. *Comp.*  
699 *Biochem. Physiol.* **171A**, 1–8.
- 700 **Kim, Y.K., Watanabe, S., Kaneko, T., Huh, M.D. and Park, S.I.** (2010). Expression of  
701 aquaporins 3, 8 and 10 in the intestines of freshwater- and seawater-acclimated Japanese eels  
702 *Anguilla japonica*. *Fisheries Sci.* **76**, 695-702.
- 703 **Kim, Y.K., Watanabe, S., Park, S.I., Jeong, J.B., Kaneko, T., Park, M.A. and Yeo, I.K.** (2013).  
704 Molecular characterization and gene expression of Na<sup>+</sup>-K<sup>+</sup>-2Cl<sup>-</sup> cotransporter2 (NKCC2) in the  
705 gastrointestinal tract of Olive flounder (*Paralichthys olivaceus*) during the four days after  
706 infection with *Streptococcus parauberis*. *Mar. Fresh. Behav. Physiol.* **46**, 145-157.
- 707 **King, L.S., Kozono, D. and Agre, P.** (2004). From structure to disease: the evolving tale of  
708 aquaporin biology. *Nature Reviews Mol. Cell Biol.* **5**, 687-698.
- 709 **Koressaar, T. and Remm, M.** (2007). Enhancements and modifications of primer design program  
710 Primer3. *Bioinformatics* **23**, 1289-1291.
- 711 **Krogh, A.** (1937). Osmotic regulation in freshwater fishes by active absorption of chloride ions. *Z.*  
712 *Vgl. Physiol.* **24**, 656-666.

- 713 **Laforenza, U., Cova, E., Gastaldi, G., Tritto, S., Grazioli, M., LaRusso, N.F., Splinter, P.L.,**  
714 **D’Adamo, P., Tosco, M. and Ventura, U.** (2005). Aquaporin-8 is involved in water transport in  
715 isolated superficial colonocytes from rat proximal colon. *J. Nutr.* **135**, 2329-2336.
- 716 **Laforenza, U., Scaffino, M.F. and Gastaldi, G.** (2013). Aquaporin-10 represents an alternative  
717 pathway for glycerol efflux from human adipocytes. *PLOS One* **8**, e54474.
- 718 **Larsen, E.H. and Møbjerg, N.** (2006). Na<sup>+</sup> recirculation and isosmotic transport. *J. Membrane*  
719 *Biol.* **212**, 1–15.
- 720 **Li, H., Kamiie, J., Morishita, Y., Yoshida, Y., Yaoita, E., Ishibashi, E. and Yamamoto, T.**  
721 (2005). Expression and localization of two isoforms of AQP10 in human small intestine. *Biol.*  
722 *Cell* **97**, 823-829.
- 723 **Lignot, J.-H., Cutler, C.P., Hazon, N. and Cramb, G.** (2002). Immunolocalisation of aquaporin 3  
724 in the gill and the gastrointestinal tract of the European eel *Anguilla anguilla* (L.). *J. Exp. Biol.*  
725 **205**, 2653-2663.
- 726 **Loo, D.D.F., Hirayama, B.A., Meinild, A.-K., Chandy, G., Zeuthen, T. and Wright, E.M.**  
727 (1999). Passive water and ion transport by cotransporters. *J. Physiol.* **518**, 195-202.
- 728 **Loo, D.D.F., Wright, E.M. and Zeuthen, T.** (2002). Water pumps. *J. Physiol.* **542**, 53–60.
- 729 **Loo, D.D.F., Zeuthen, T., Chandy, G. and Wright, E.M.** (1996). Cotransport of water by the  
730 Na<sup>+</sup>/glucose cotransporter. *Proc. Natl. Acad. Sci. USA* **93**, 13367-13370.
- 731 **Lytle C., Xu, J.C., Biemesderfer, D. and Forbush, B.** (1995). Distribution and diversity of Na-K-  
732 Cl cotransporter proteins: a study with monoclonal antibodies. *Am. J. Physiol. (Cell Physiol.)*  
733 **269**, C1469-C1505.
- 734 **MacIver, B., Cutler, C.P., Yin, J., Hill, M.G., Zeidel, M.L. and Hill, W.G.** (2010). Expression  
735 and functional characterization of four aquaporin water channels from the European eel  
736 (*Anguilla anguilla*) *J. Exp. Biol.* **212**, 2856-2863.
- 737 **Madsen, S.S., Olesen, J.H., Bedal, K., Engelund, M.B., Velsaco-Santamaria, Y.M. and**  
738 **Tipsmark, C.K.** (2011). Functional characterization of water transport and cellular localization  
739 of three aquaporin paralogs in the salmonid intestine. *Frontiers in Aquatic Physiology* doi:  
740 10.3389/fphys.2011.00056.
- 741 **Marshall, W.S., Howard, J.A., Cozzi R.R.F. and Lynch, E.M.** (2002). NaCl and fluid secretion by  
742 the intestine of the teleost *Fundulus heteroclitus*: involvement of CFTR. *J. Exp. Biol.* **205**, 745–  
743 758. **Martinez, A.-S., Cutler, C.P., Wilson, G.D., Phillips, C., Hazon, N. and Cramb, G.**  
744 (2005). Regulation of expression of two aquaporin homologs in the intestine of the European eel:



- 745 effects of seawater acclimation and cortisol treatment. *Am. J. Physiol. (Regul. Integr. Comp.*  
746 *Physiol.)* **288**, R1733-R1743.
- 747 **Mobasheri, A. and Marples, D.** (2004). Expression of the AQP-1 water channel in normal human  
748 tissues: a semiquantitative study using tissue microarray technology. *Am. J. Physiol. (Cell*  
749 *Physiol.)* **286**, C529-C537.
- 750 **Mobasheri, A., Shakibaei, M. and Marples, D.** (2004). Immunohistochemical localization of  
751 aquaporin 10 in the apical membranes of the human ileum: a potential pathway for luminal water  
752 and small solute absorption. *Histochem. Cell Biol.* **121**, 463-471.
- 753 **Morinaga, T., Nakakoshi, M., Hirao, A., Imai, M. and Ishibashi, K.** 2002. Mouse aquaporin 10  
754 gene (AQP10) is a pseudogene. *Biochem. Biophys. Res. Commun.* **294**, 630-634.
- 755 **Morishita, Y., Matsuzaki, T., Hara-chikuma, M., Andoo, A., Shimono, M., Matsuki, A.,**  
756 **Kobayashi, K., Ikeda, M., Yamamoto, T., Verkman, A., Kusano, E., Ookawara, S., Takata,**  
757 **K., Sasaki, S. and Ishibashi, K.** (2005). Disruption of aquaporin-11 produces polycystic  
758 kidneys following vacuolization of the proximal tubule. *Mol. Cell. Biol.* **25**, 7770-7779.
- 759 **O'Grady, S.M., Musch, M.W. and Field, M.** (1986). Stoichiometry and ion affinities of the Na-K-  
760 Cl cotransport system in the intestine of the winter flounder (*Pseudopleuroectes americanus*). *J.*  
761 *Membr. Biol.* **91**, 33-41.
- 762 **Pandey, R.N., Yaganti, S., Coffey, S., Frisbie, J., Alnajjar, K. and Goldstein, D.** (2010).  
763 Expression and immunolocalization of aquaporins HC-1, -2, and -3 in Cope's gray treefrog, *Hyla*  
764 *chrysoscelis*. *Comp. Biochem. Physiol.* **157**, 86-94.
- 765 **Pfaffl, M.W.** (2001). A new mathematical model for relative quantification in real-time RT-PCR.  
766 *Nucleic Acids Res.* **29**: e45.
- 767 **Polakof, S., Álvarez, R. and Soengas, J.L.** (2010). Gut glucose metabolism in rainbow trout:  
768 implications in glucose homeostasis and glucosensing capacity. *Am. J. Physiol. (Regul. Integr.*  
769 *Comp. Physiol.)* **299**, R19-R32.
- 770 **Raldúa, D., Otero, D., Fabra, M. and Cerdà, J.** (2008). Differential localization and regulation of  
771 two aquaporin-1 homologs in the intestinal epithelia of the marine teleost *Sparus aurata*. *Am. J.*  
772 *Physiol. (Regul. Integr. Comp. Physiol.)* **294**, R993-R1003.
- 773 **Rodríguez A, Catalán V, Gómez-Ambrosi J, García-Navarro S, Rotellar F, Valentí, V., Silva,**  
774 **C., Gil, M.J., Salvador, J., Burrell, M.A., Calamita, G., Malagón, M.M. and Frühbeck, G.**  
775 (2011). Insulin- and leptin-mediated control of aquaglyceroporins in human adipocytes and

- 776 hepatocytes is mediated via the PI3K/Akt/mTOR signaling cascade. *J. Clin. Endocrinol. Metab.*  
777 **96**, E586-597.
- 778 **Rosenthal, R., Milatz, S., Krug, S.M., Oelrich, B., Schulzke, J.-D., Amasheh, S., Günzel, D.**  
779 **and Fromm, M.** (2010). Claudin-2, a component of the tight junction, forms a paracellular water  
780 channel. *J. Cell Sci.* **123**, 1913-1921.
- 781 **Russell, J.M.** (2000). Sodium-potassium-chloride cotransport. *Physiol Rev* **80**, 211-276.
- 782 **Sakamoto, T., Kozaka, T., Takahashi, A., Kawauchi, H. and Ando, M.** (2001). Medaka  
783 (*Oryzias latipes*) as a model for hypoosmoregulation of euryhaline fishes. *Aquaculture* **193**, 347-  
784 354.
- 785 **Santos, C.R.A., Estêvão, M. D., Fuentes, J., Cardoso, J.C.R., Fabra, M., Passos, A.L.,**  
786 **Detmers, F.J., Deen, P.M.T., Cerdà, J. and Power, D.M.** (2004). Isolation of a novel  
787 aquaglyceroporin from a marine teleost (*Sparus auratus*): function and tissue distribution. *J. Exp.*  
788 *Biol.* **207**, 1217-1227.
- 789 **Saparov, S. M., Liu, K., Agre, P. and Pohl, P.** (2007). Fast and selective ammonia transport by  
790 aquaporin-8. *J. Biol. Chem.* **282**, 5296-5301.
- 791 **Smith, H.W.** (1929). The excretion of ammonia and urea by the gills of fish. *J. Biol. Chem.* **81**,  
792 727–742.
- 793 **Sundell, K. and Sundh, H.** (2011). Intestinal fluid absorption in anadromous salmonids:  
794 Importance of tight junctions and aquaporins. *Frontiers in Aquatic Physiology* doi: 10.3389/  
795 fphys.2012.00388.
- 796 **Tanaka, M.** (1995). Characteristics of medaka genes and their promoter regions. *Fish Biol. J.*  
797 *Medaka* **7**, 11–14.
- 798 **Tingaud-Sequeira, A., Calusinska, M., Finn, R.N., Chauvigné, F., Lozano, J. and Cerdà, J.**  
799 (2010). The zebrafish genome encodes the largest vertebrate repertoire of functional aquaporins  
800 with dual paralogy and substrate specificities similar to mammals. *BMC Evol. Biol.* **10**, 38.
- 801 **Tipsmark, C.K., Mahmmoud, Y.A., Borski, R.J. and Madsen S.S.** (2010a). FXYP-11 associates  
802 with Na<sup>+</sup>-K<sup>+</sup>-ATPase in the gill of Atlantic salmon: regulation and localization in relation to  
803 changed ion-regulatory status. *Am. J. Physiol.* **299**, R1212-R1223.
- 804 **Tipsmark, C.K., Sørensen, K.J. and Madsen, S.S.** (2010b). Aquaporin expression dynamics in  
805 osmoregulatory tissues of Atlantic salmon during smoltification and seawater acclimation. *J.*  
806 *Exp. Biol.* **213**,368-379.

- 807 **Tse, W.K.F., Au, D.W.T. and Wong, C.K.C.** (2006). Characterization of ion channel and  
808 transporter mRNA expressions in isolated gill chloride and pavement cells of seawater  
809 acclimating eels. *Biochem. Biophys. Res. Commun.* **346**,1181-1190.
- 810 **Tyagi, M.G. and Tangevelu, P.** (2010). A possible role of aquaporin water channels in blood cell  
811 migration in spleen; interaction with cluster of differentiation molecules. *J. Exp. Sci.***1**, 41-42.
- 812 **Untergrasser A, Cutcutache I, Koressaar T, Ye J, Faircloth BC, Remm M, Rozen SG** (2012).  
813 Primer3 - new capabilities and interfaces. *Nucleic Acids Res.* **40**: e115.
- 814 **Wakayama, Y., Inoue, M., Kojima, H., Jimi, T., Shibuya, S., Hara, H. and Oniki, H.** (2004).  
815 Expression and localization of aquaporin 7 in normal skeletal myofiber. *Cell. Tissue Res.* **316**,  
816 123-129.
- 817 **Watanabe, S., Kaneko, T. and Aida, K.** (2005). Aquaporin-3 expressed in the basolateral  
818 membrane of gill chloride cells in Mozambique tilapia *Oreochromis mossambicus* adapted to  
819 freshwater and seawater. *J. Exp. Biol.* **208**, 2673-2682.
- 820 **Watanabe, S., Mekuchi, M., Ideuchi, H., Kim, Y.K. and Kaneko, T.** (2011). Electroneutral  
821 cation-Cl<sup>-</sup> cotransporters NKCC2 $\beta$  and NCC $\beta$  expressed in the intestinal tract of Japanese eel  
822 *Anguilla japonica*. *Comp. Biochem. Physiol.* **159A**, 427-435.
- 823 **Wood, C.M. and Grosell, M.** (2012). Independence of net water flux from paracellular  
824 permeability in the intestine of *Fundulus heteroclitus*, a euryhaline teleost. *J. Exp. Biol.* **215**,  
825 508-517.
- 826 **Yakata, K., Hiroaki, Y., Ishibashi, K., Sohara, E., Sasaki, S., Mitsuoka, K. and Fujiyoshi, Y.**  
827 (2007). Aquaporin-11 containing a divergent NPA motif has normal water channel activity.  
828 *Biochim. Biophys. Acta* **1768**, 688-693.
- 829 **Xue, H., Liu, S.M., Ji, T., Ren, W., Zhang, X.H., Zheng, L.F., Wood, J.D. and Zhu J.X.** (2009).  
830 Expression of NKCC2 in the rat gastrointestinal tract. *Neurogastroenterol. Motil.* **21**, 1068-1076.  
831

832 **Figure legends**

833 **Fig. 1. Transcript levels of aquaporins (A-G) and the NKCC2 cotransporter (H) in various**  
834 **tissues from Japanese medaka.** Bars represent the mean value of 4 FW- and 4 SW-acclimated fish  
835 (4 males + 4 females) + s.e.m. Expression levels are shown in arbitrary units as calculated relative  
836 to the geometric mean of three normalization (see Methods), and for each transcript subsequently  
837 normalized relative to the highest expression level (=100). Shared letters above the bars indicate not  
838 significantly different. An asterisk (\*) above a bar indicates that FW value was significantly higher  
839 than SW value; a cross (#) above a bar indicates that SW value was significantly higher than FW  
840 values. P < 0.05, Bonferoni adjusted least significant differences test.

841  
842 **Fig. 2. The effect of FW-to-SW transfer on transcript levels of intestinal aquaporins (A-G)**  
843 **and muscle water content (H) of Japanese medaka.** Fish were transferred from FW to SW or FW  
844 to FW as control at time zero and sampled at 24 and 72 hours (N=6). Expression levels are shown  
845 in arbitrary units as calculated relative to the geometric mean of three normalization (see Methods),  
846 and for each transcript subsequently normalized to the level of the 24 h FW group. The labels "sal",  
847 "time" and "sal x time" refer to overall factorial effects (salinity and time) and their interaction (2-  
848 way ANOVA) at the P-level indicated by the number of asterisks: \* P<0.05, \*\*P<0.01;  
849 \*\*\*P<0.001. In the case of factorial interaction, FW and SW mean values were compared at each  
850 time point (Student's t-test) and significance is indicated by a cross (#) above a bar. Values are  
851 means + s.e.m.

852  
853 **Fig. 3. The effect of FW-to-SW transfer on transcript levels of Na<sup>+</sup>,K<sup>+</sup>-ATPase alpha subunit**  
854 **isoforms (A-F), the NKCC2 cotransporter (G) and the sodium-glucose tranporte type-1 (H) in**  
855 **the intestine of Japanese medaka.** Fish were transferred from FW to SW or FW to FW as control  
856 at time zero and sampled at 24 and 72 hours (N=6). For further explanation see the legend to Fig. 2.

857  
858  
859 **Fig. 4. The effect of SW-to-FW transfer on transcript levels of intestinal aquaporins (A-G)**  
860 **and muscle water content (H) of Japanese medaka.** Fish were transferred from SW to FW or SW  
861 to SW as control at time zero and sampled at 24 and 72 hours (N=6). For further explanation see the  
862 legend to Fig. 2.

863

864 **Fig. 5. The effect of SW-to-FW transfer on normalized transcript levels of Na<sup>+</sup>,K<sup>+</sup>-ATPase**  
865 **alpha subunit isoforms (A-F), the NKCC2 cotransporter (G) and the sodium-glucose**  
866 **transporter type-1 (H) in the intestine of Japanese medaka.** Fish were transferred from SW to  
867 FW or SW to SW as control at time zero and sampled at 24 and 72 hours (N=6). For further  
868 explanation see the legend to Fig. 2.

869

870 **Fig. 6. Western blots of enriched membrane fractions from homogenized intestines of FW**  
871 **Japanese medaka.** Membrane strips were probed with a cocktail of two primary antibodies against  
872 one of the three aquaporins: Aqp1a (lane 2), Aqp8ab (lane 6) and Aqp10a (lane 10) (green bands)  
873 and  $\beta$ -actin (red band). Lanes 1, 3, 5, 7, 9 and 11 show the molecular weight marker as indicated to  
874 the left. The Aqp antibodies recognize major immunoreactive proteins around 25 kDa (Aqp1a), 28  
875 kDa and a duplet around 35-40 kDa (Aqp8ab) and 35 kDa (Aqp10a), respectively. The  $\beta$ -actin  
876 antibody recognizes one band around 43 kDa. In lanes 4, 8, and 12 (block) the Aqp antibodies are  
877 neutralized by 400x molar excess of the antigenic peptide prior to incubation. Upon neutralization,  
878 the Aqp-specific band(s) are weakened or disappear.

879

880 **Fig. 7. Quantification of Western blots by densitometric scanning.** Membrane fractions from  
881 intestines of 5 FW- and 5 SW-acclimated Japanese medaka were analyzed by Western blotting  
882 using a cocktail of two primary antibodies against one of the three aquaporins (Aqp1a, Aqp8ab,  
883 Aqp10a) and  $\beta$ -actin as loading control. The specific bands were quantified by densitometric  
884 scanning and normalized to  $\beta$ -actin. Asterisks (\*) indicate significant difference from the  
885 corresponding FW value, Student's t-test, P<0.05. Values are means + s.e.m.

886

887 **Fig. 8. Representative micrographs of intestinal cross sections from FW (A,B) and SW (C,D)**  
888 **Japanese medaka probed with a cocktail of primary antibodies against Aqp1a (red) and the**  
889 **Na<sup>+</sup>,K<sup>+</sup>-ATPase alpha subunit (green).** Nuclei are stained with DAPI and appear blue. A  
890 pronounced apical Aqp staining is lining the FW intestine and disappears or is retracted into the  
891 cytosolic compartment in the SW intestine. Bars indicate 50  $\mu$ m.

892

893 **Fig. 9. Representative micrographs of intestinal cross sections from FW (A,B,C) and SW**  
894 **(D,E,F) Japanese medaka probed with a cocktail of primary antibodies against Aqp8ab (red)**  
895 **and the Na<sup>+</sup>,K<sup>+</sup>-ATPase alpha subunit (green).** Nuclei are stained with DAPI and appear blue. A

896 pronounced apical Aqp staining is lining the FW intestine and disappears or is retracted into the  
897 cytosolic compartment in the SW intestine. Bars indicate 50  $\mu\text{m}$ .

898

899 **Fig. 10. Representative micrographs of intestinal cross sections from FW (A,B) and SW (C,D)**  
900 **Japanese medaka probed with a cocktail of primary antibodies against Aqp10a (red) and the**  
901  **$\text{Na}^+, \text{K}^+$ -ATPase alpha subunit (green).** Nuclei are stained with DAPI and appear blue. In (B) only  
902 the red and blue channels are shown. A pronounced apical Aqp staining is lining the FW intestine  
903 and disappears or is diminished in the SW intestine. Bars indicate 20 or 50  $\mu\text{m}$  as indicated.

904

905 **Table 1. Transepithelial resistance (TER in  $\Omega \cdot \text{cm}^2$ ) in anterior and posterior regions of the**  
906 **intestine of Japanese medaka acclimated to FW and SW.**

907

|           | <b>Anterior</b> | <b>Posterior</b> |
|-----------|-----------------|------------------|
| <b>FW</b> | 12.2 ± 1.7      | 3.4 ± 0.7        |
| <b>SW</b> | 9.7 ± 1.9       | 3.7 ± 1.5        |

908

909 Each region was examined in triplicate-quadruplicate sections from the same fish (N=4). There was  
910 an overall effect of region (P<0.0005, 2-way ANOVA) but not salinity on TER.

911 **Table 2: Primer sequences for quantitative real time PCR of Japanese medaka transcript**  
 912 **targets and normalisation genes.**

913

| Target name      | Forward primer       | Reverse primer        | Ensemble ID        | Amplicon size (bp) |
|------------------|----------------------|-----------------------|--------------------|--------------------|
| Aqp1a            | CTGGGACATTTGGCAGCTAT | CCAGTGGTCCGTAAAATCGT  | ENSORLT00000022053 | 99                 |
| Aqp3a            | GCCTTCACTGTGGGATTTGT | GAGGTCTCTGGCAGGATTGA  | ENSORLT00000012760 | 87                 |
| Aqp7             | GACATTGCACCCAGGTTCTT | CAACTAGAGGCACCCACCAC  | ENSORLT00000011131 | 91                 |
| Aqp8ab           | GCTGCTAAGCCTCCCAGTAA | CCGACACACAACCAATGAAG  | ENSORLT00000003813 | 97                 |
| Aqp10a           | CAGGCTGGGGTACAGAAGTC | CCAAAATGCCTCCAAGAAGA  | ENSORLT00000012051 | 84                 |
| Aqp10b           | GCTGAATGTCTGGGGGTCTA | AATCCCAGGTTGATGGACAG  | ENSORLT00000000413 | 110                |
| Aqp11a           | TCGAGAAAATCCTCCCCTTC | ACAGCCTCTTCTGCTTCTGG  | ENSORLT00000018867 | 81                 |
| NKCC2            | ACCATTGCTCCCATCATCTC | TGGAGACCGAGCATAAGAGG  | ENSORLT00000003347 | 90                 |
| SGLT1            | AACTGCTGCCGATGTTTCTT | CCGACACCAGAGTCACAGAA  | ENSORLT00000012185 | 118                |
| Atp- $\alpha$ 1a | ATCCTCGCCAGTATCCCTCT | TGTCGCTCTCAGCTTCTTCA  | ENSORLT00000023207 | 111                |
| Atp- $\alpha$ 1b | GAACCGTCACCATCCTCTGT | TGTCGCTCTCAGCTTCTTCA  | ENSORLT00000002643 | 83                 |
| Atp- $\alpha$ 1c | CAGCTGGACGACATTTTGAA | CCTGTCTCTGACAGCCCTTCC | ENSORLT00000002556 | 97                 |
| Atp- $\alpha$ 2  | TTCAGTGGGCGGATCTTATC | CAGAGCCGTCTCAACAAACA  | ENSORLT00000003295 | 107                |
| Atp- $\alpha$ 3a | CGTCATCATGGCTGAAAATG | ATTGCTGGCCATAGCTGTCT  | ENSORLT00000008844 | 106                |
| Atp- $\alpha$ 3b | TTGCCCCCTTAATGTCACTC | GGGGCAGTTGTGATGAAAAT  | ENSORLT00000016540 | 85                 |
| rplp0            | AGAGTCCTGGCAGTTGCTGT | AGCAGCAAAAAGCAGTTGGAT | ENSORLT00000011509 | 93                 |
| $\beta$ -actin   | GAGAGGGAAATTGTCCGTGA | CTTCTCCAGGGAGGAAGAGG  | ENSORLT00000017152 | 102                |
| EF-1 $\alpha$    | ACGTGTCCGTCAAGGAAATC | TGATGACCTGAGCGTTGAAG  | ENSORLT00000009544 | 96                 |

914



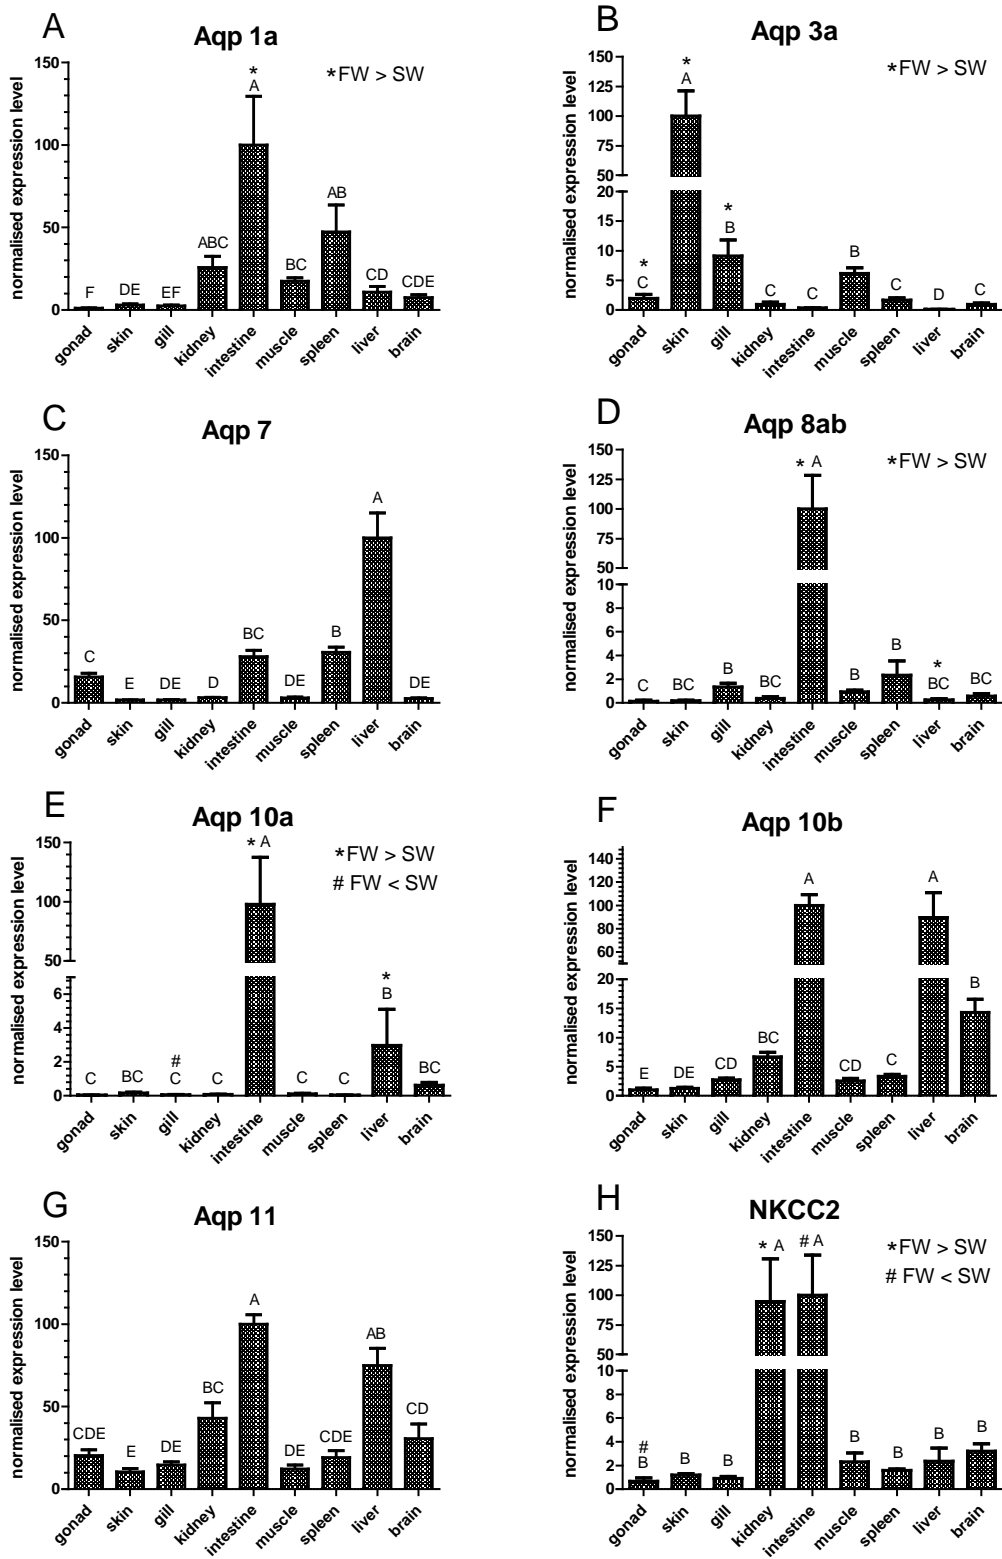

918 **Figure 2**

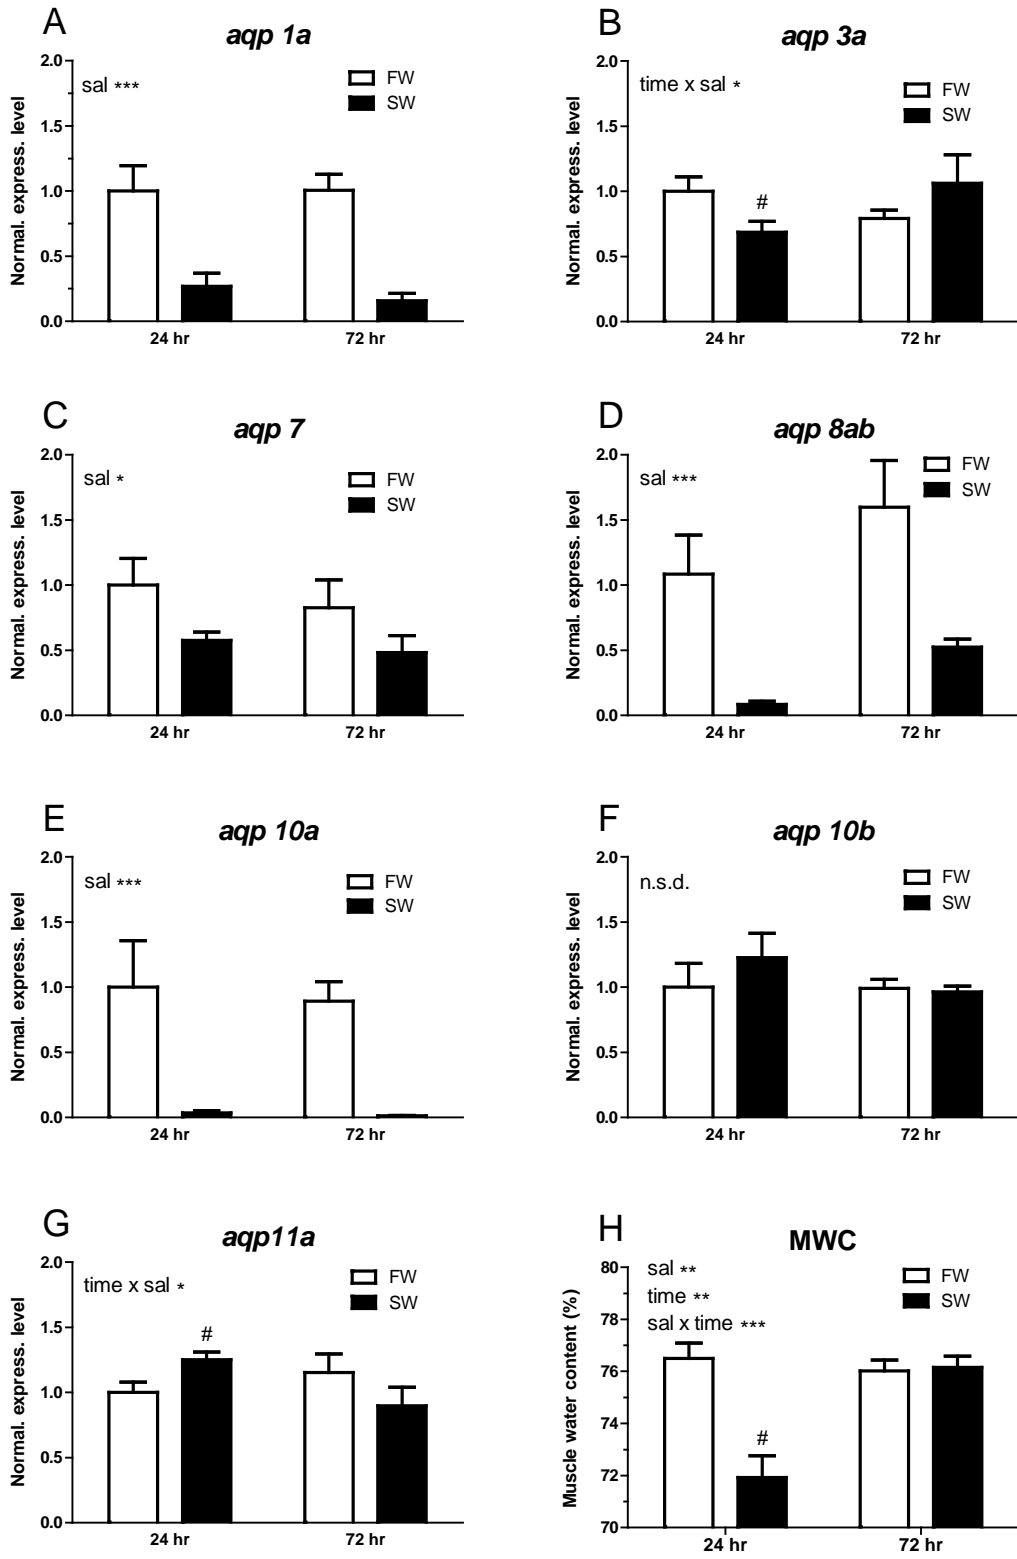

944

945 **Figure 3**

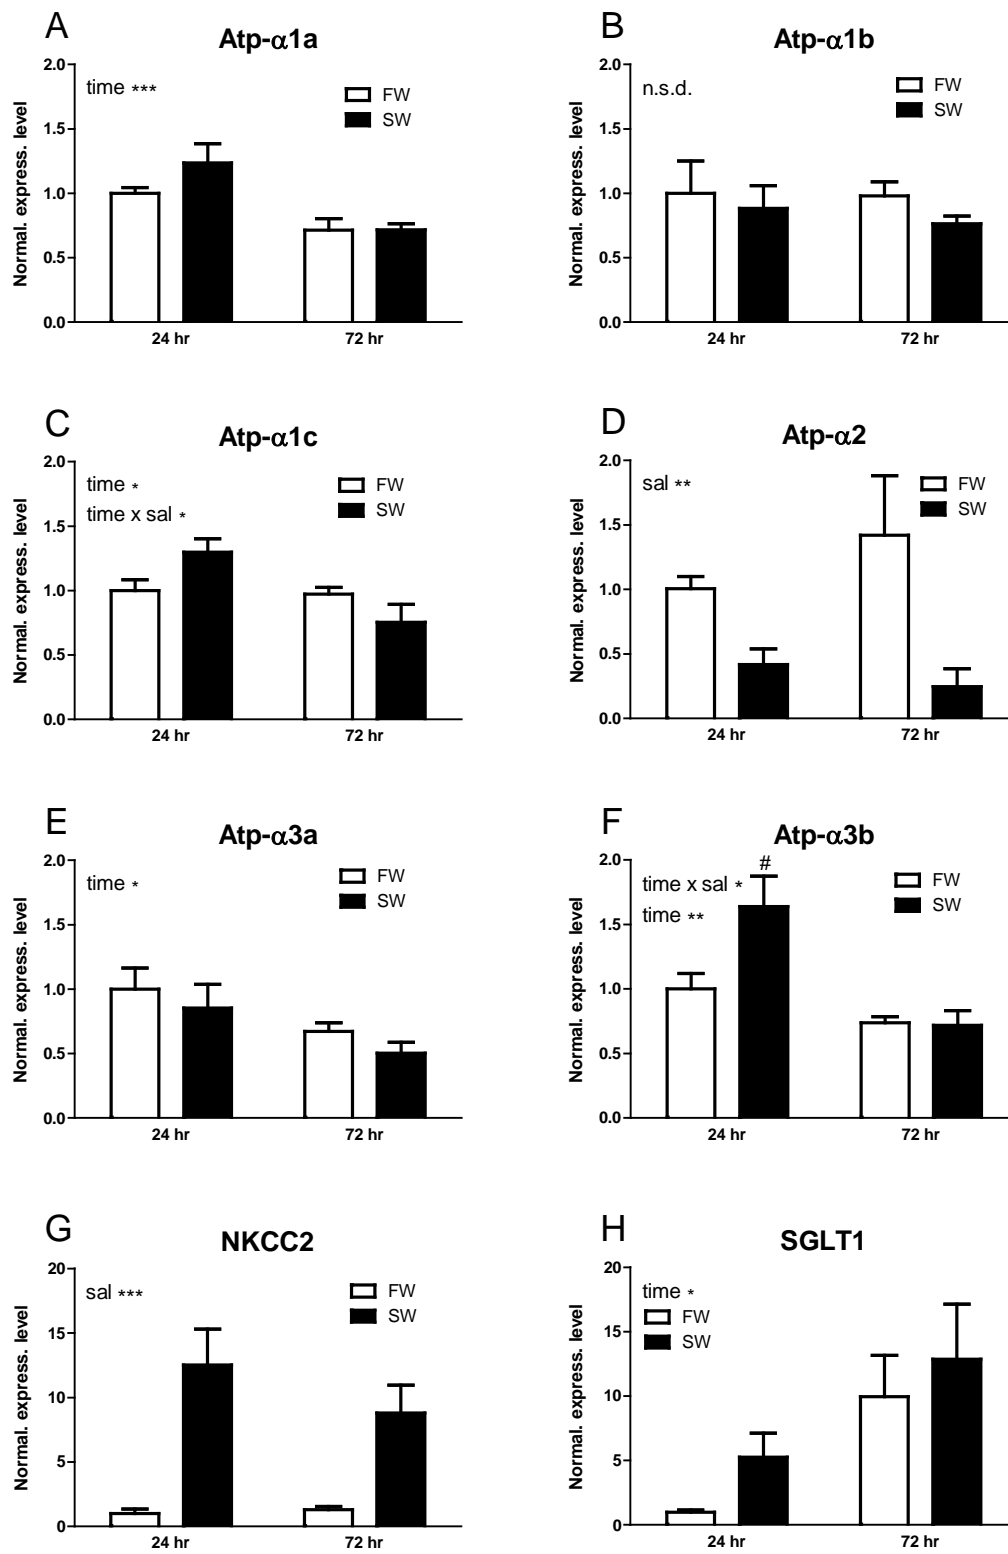

971

972 **Figure 4**

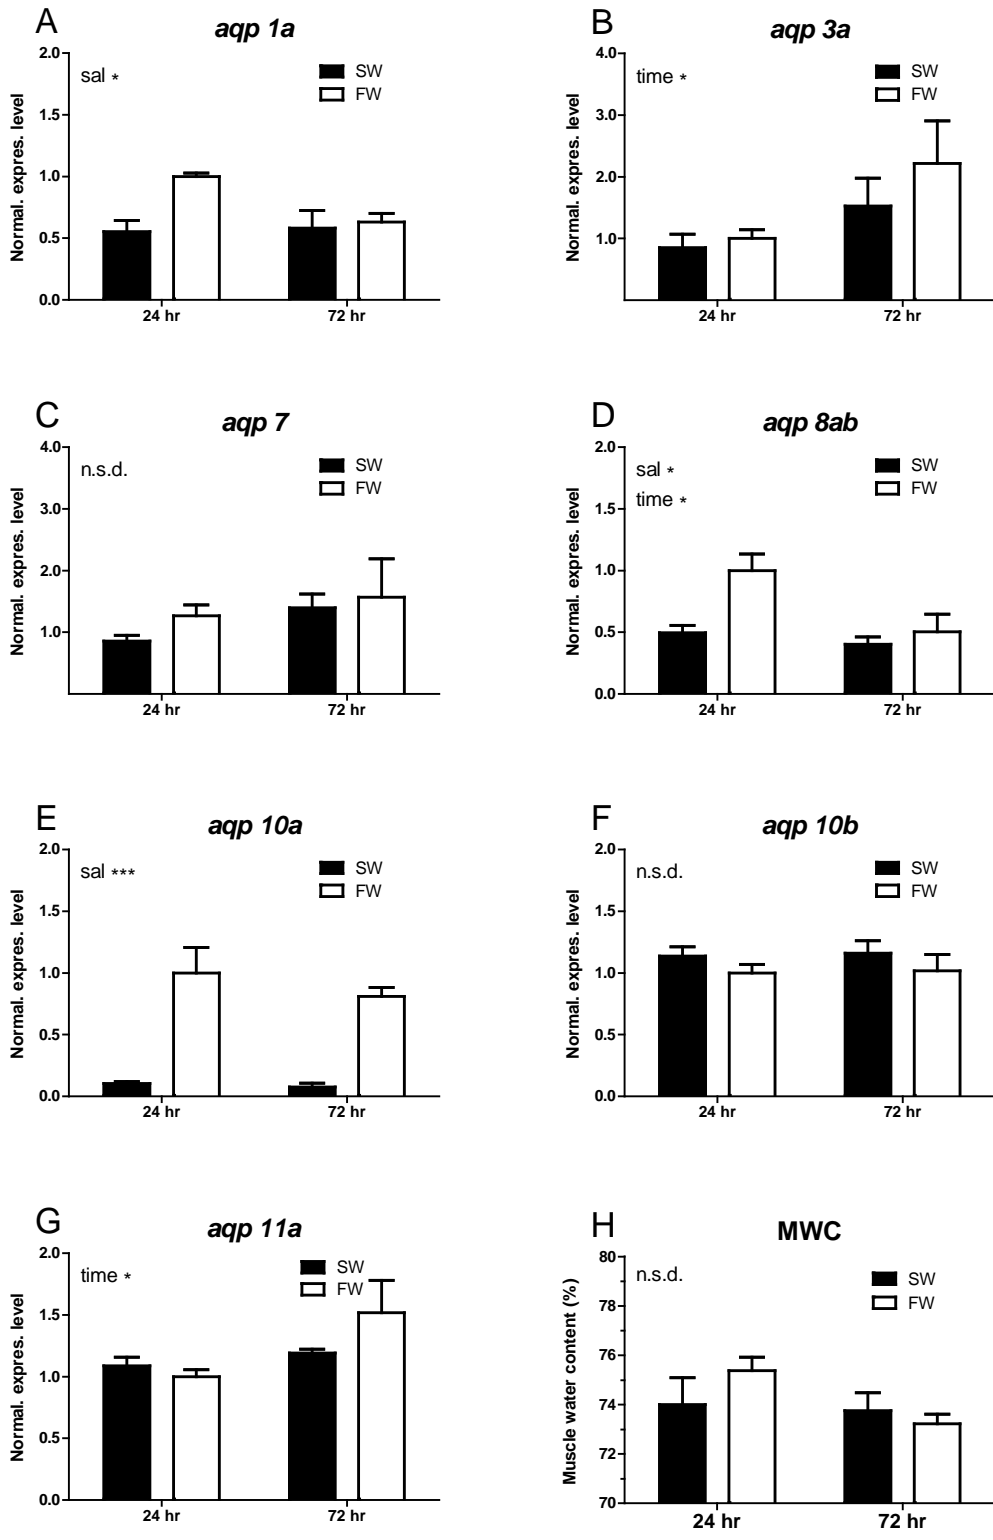

998

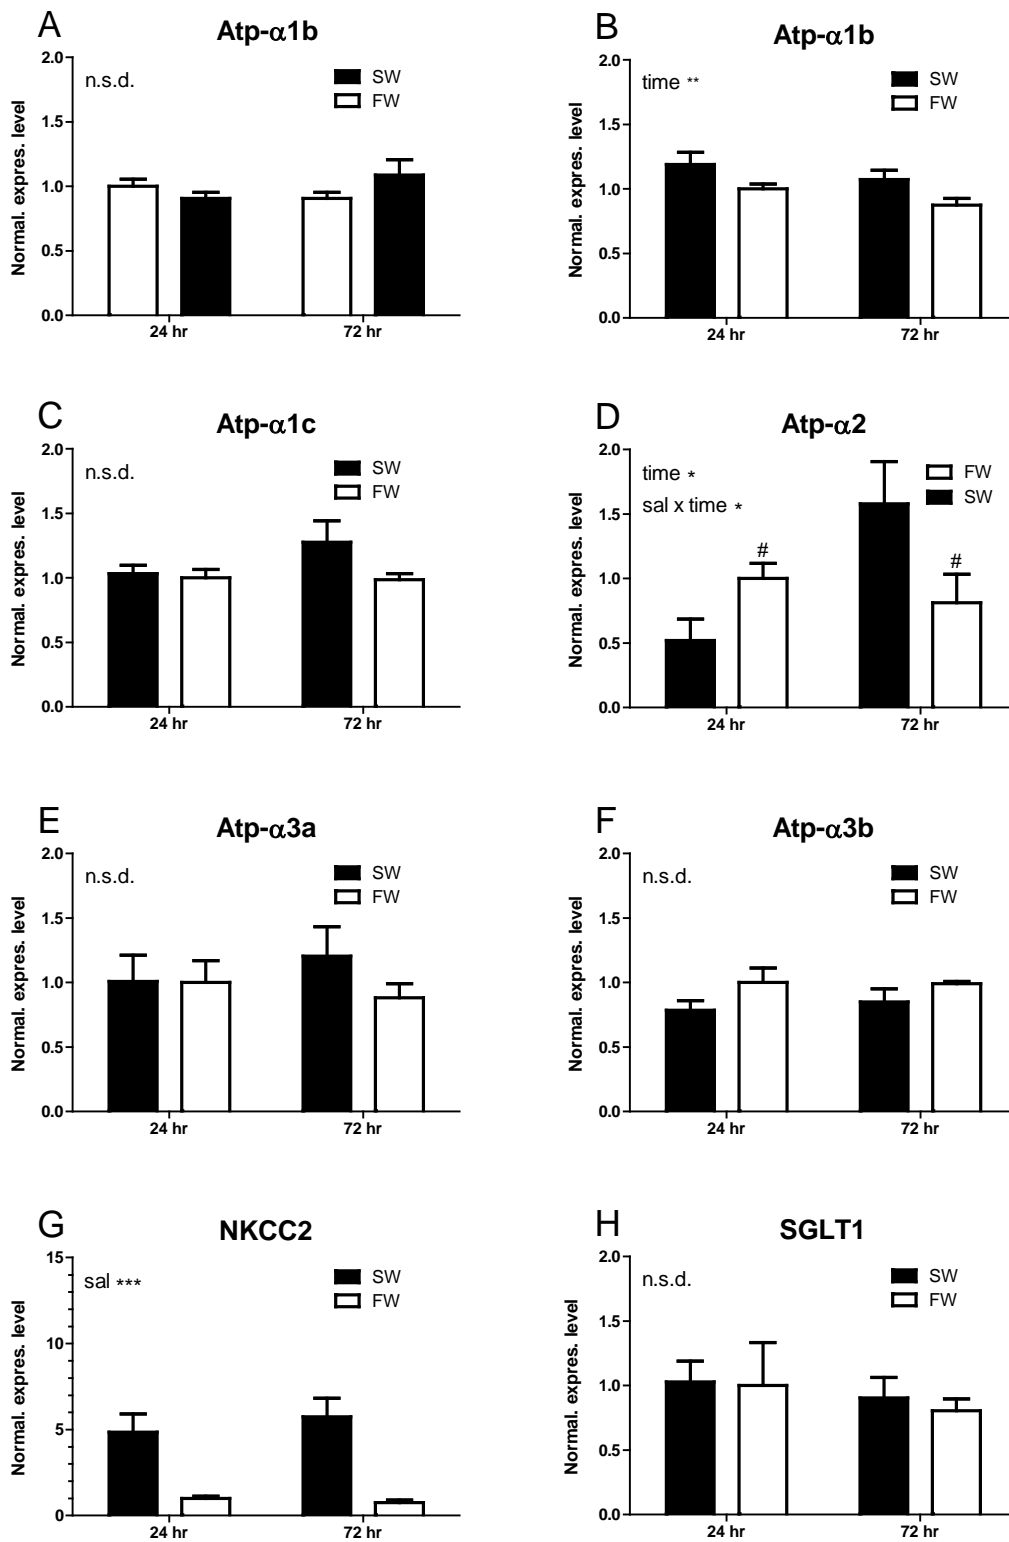

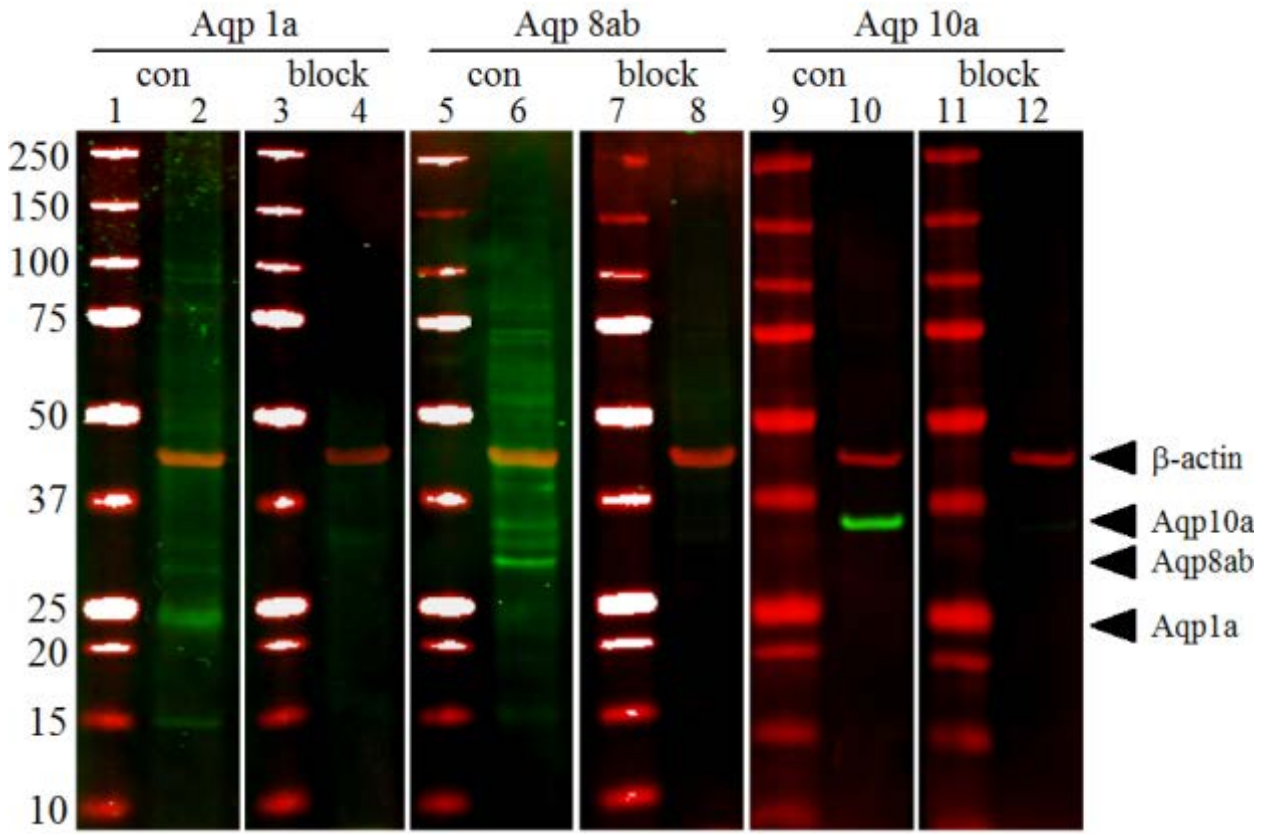

1029 **Figure 7**

1030

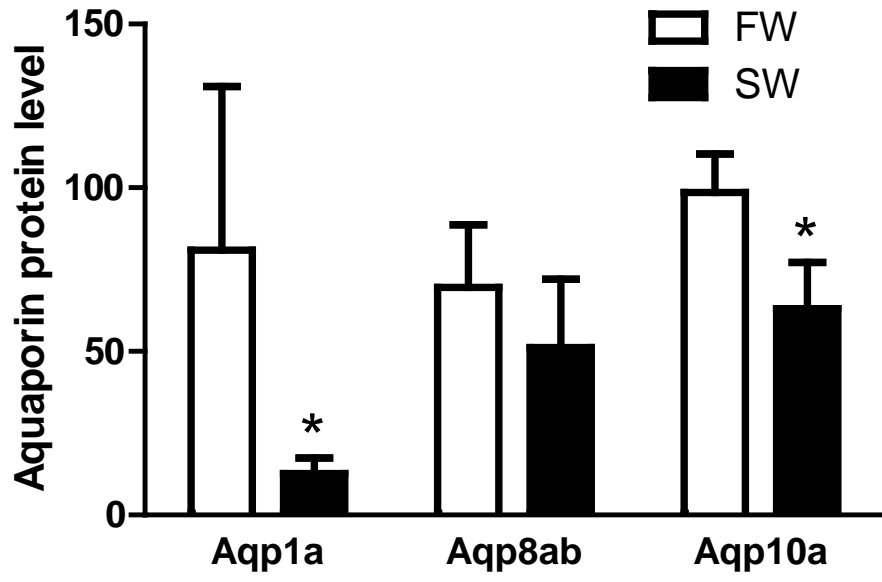

1031

1032

1033 **Figure 8**

1034

1035

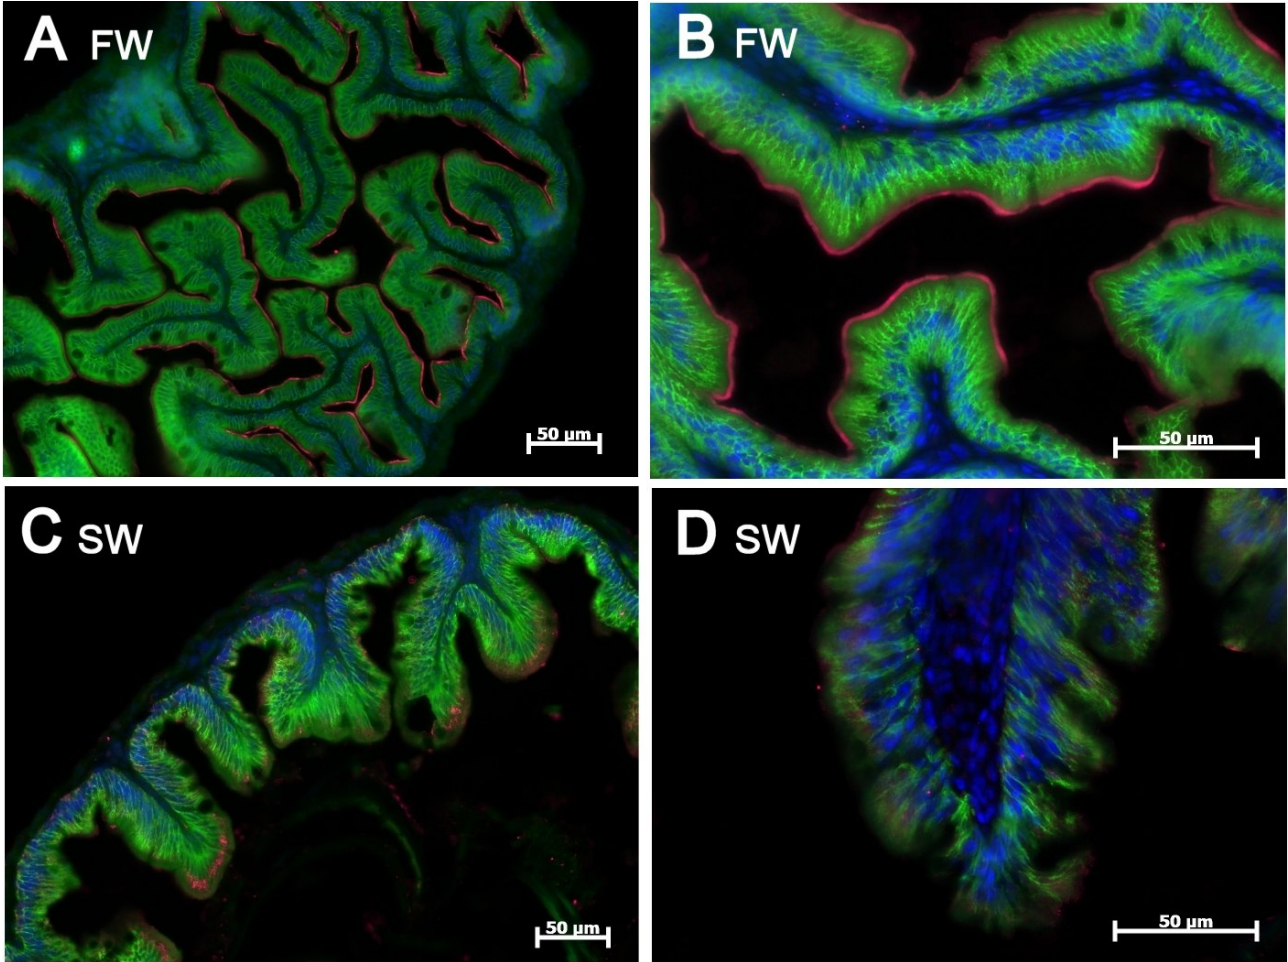

1036

1037



1038 **Figure 9**

1039

1040

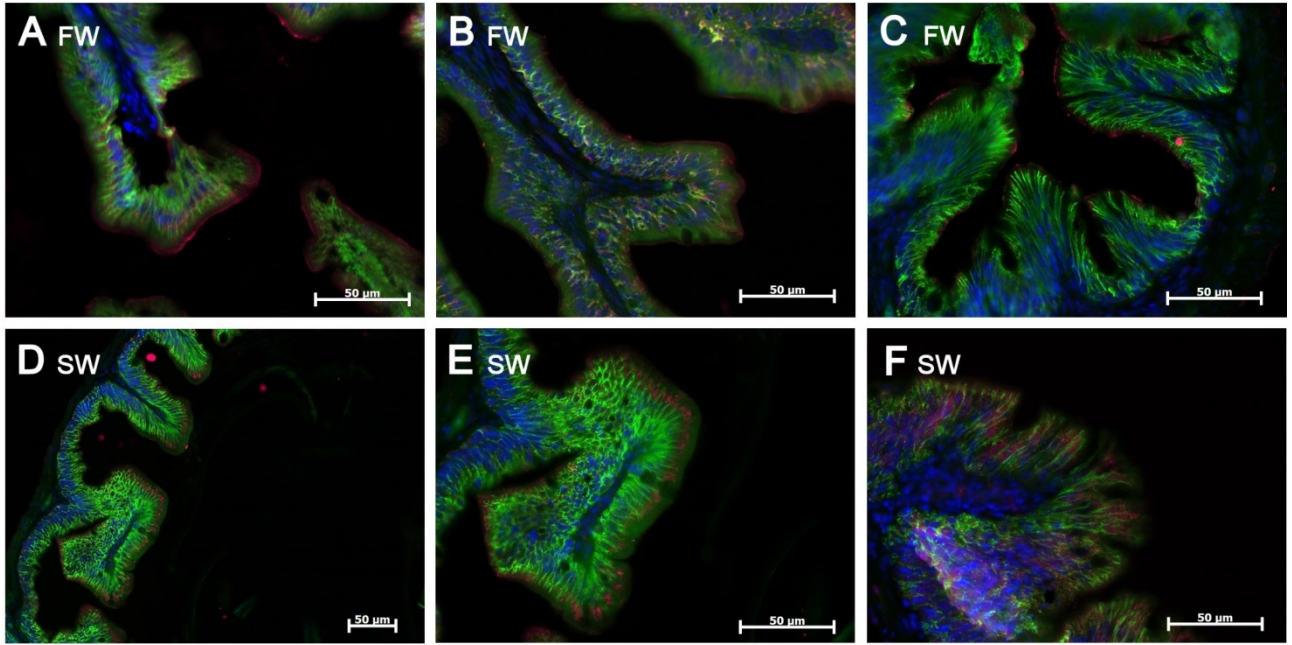

1041

1042

1043 **Figure 10**

1044

1045

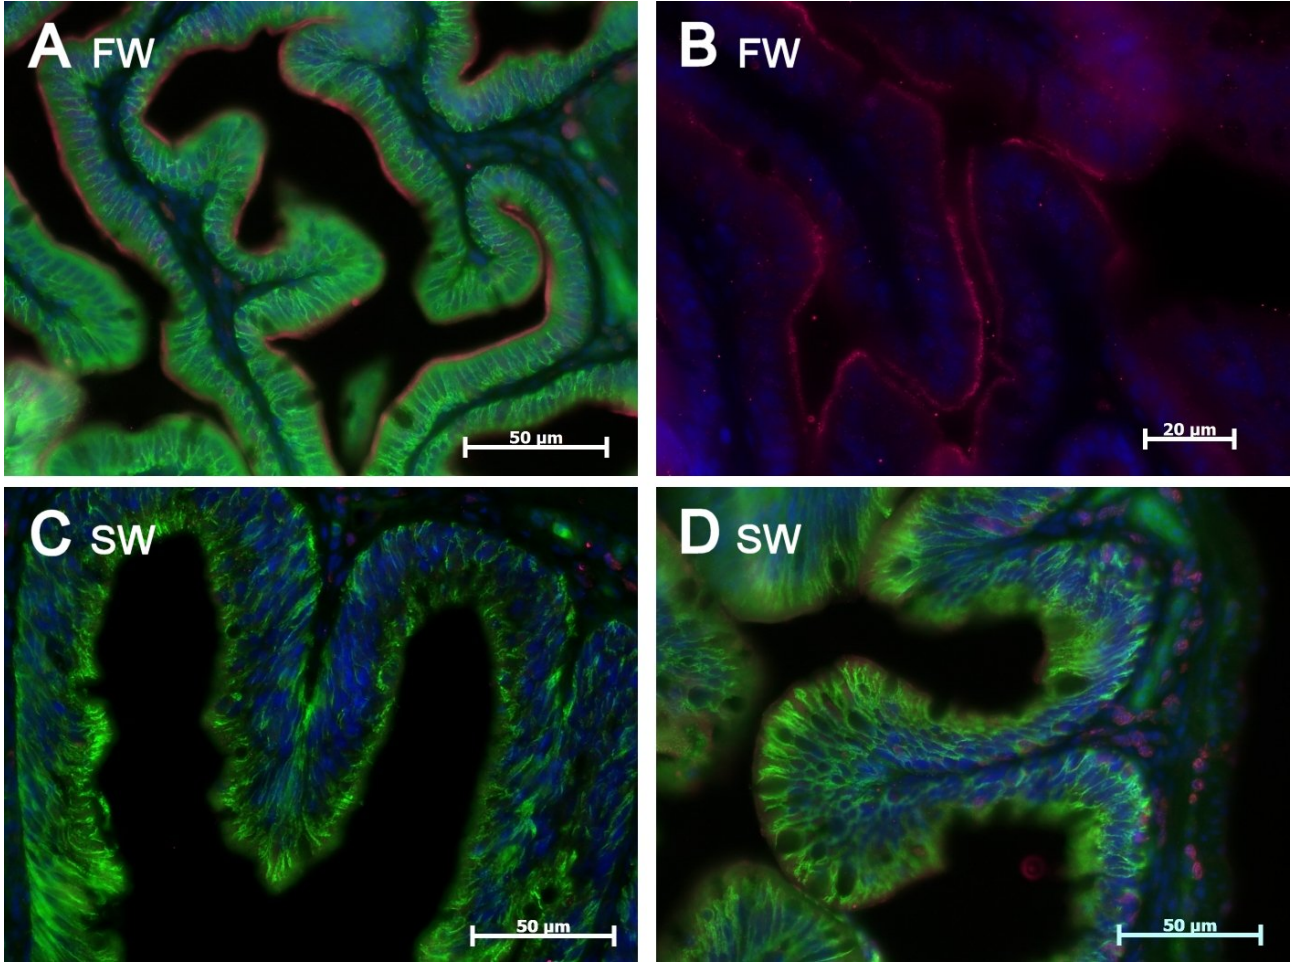

1046
